# Supplementary material for: Uncovering the Dynamic Alterations of Volatile Components in Sweet and Floral Aroma Black Tea during Processing
Source: MDPI journal article supplement (doi:10.3390/foods13050728), 2024-02-28
Supplement: s1 [file s1]

**Table S1** The information of chemicals used in this study.

| Chemicals                          | Manufacturer information                   |
|------------------------------------|--------------------------------------------|
| Ethyl decanoate                    | TCI Chemical Industry Development Co., Ltd |
| High purity water                  | Hangzhou Wahaha Group Co., Ltd.            |
| <i>n</i> -Alkane mixtures (C7-C40) | Shanghai Yuanye Biotechnology Co., Ltd.    |

**Table S2** The identified volatile compounds in sweet and floral aroma black tea during the entire manufacturing process by using GC-IMS.

| No. | Compounds            | Formula<br>s                                  | MW    | RI     | Rt [sec] | Dt [a.u.] | Types    | Peak intensities |           |           |           |                  |                 | Comment   |                 |
|-----|----------------------|-----------------------------------------------|-------|--------|----------|-----------|----------|------------------|-----------|-----------|-----------|------------------|-----------------|-----------|-----------------|
|     |                      |                                               |       |        |          |           |          | Fresh leaves     | Withering | Shaking   | Rolling   | Fermentatio<br>n | First<br>drying |           | Final<br>firing |
| #3  | Linalool             | C <sub>10</sub> H <sub>18</sub> O             | 154.3 | 1102.1 | 497.755  | 1.21735   | Alcohols | 4197.53 ±        | 6624.05 ± | 7584.27 ± | 6017.60 ± | 5979.39 ±        | 3424.66 ±       | 4269.92 ± |                 |
|     |                      |                                               |       |        |          |           |          | 318.58d          | 211.01b   | 152.96a   | 90.58c    | 68.58c           | 59.03e          | 96.77d    |                 |
| #32 | 2-Butoxyethanol      | C <sub>6</sub> H <sub>14</sub> O <sub>2</sub> | 118.2 | 898.8  | 262.525  | 1.19921   | Alcohols | 82.27 ±          | 104.16 ±  | 128.79 ±  | 62.82 ±   | 97.06 ± 8.70b    | 37.96 ±         | 41.10 ±   |                 |
|     |                      |                                               |       |        |          |           |          | 11.63c           | 8.56b     | 9.22a     | 5.44d     |                  | 2.20e           | 2.28e     |                 |
| #36 | (E)-2-Hexen-1-ol     | C <sub>6</sub> H <sub>12</sub> O              | 100.2 | 848.3  | 233.41   | 1.51715   | Alcohols | 2460.34 ±        | 2208.67 ± | 2533.77 ± | 2586.43 ± | 2979.77 ±        | 1929.30 ±       | 1782.84 ± |                 |
|     |                      |                                               |       |        |          |           |          | 50.04c           | 44.94d    | 44.44bc   | 63.06b    | 57.78a           | 48.16e          | 50.61f    |                 |
| #46 | (E)-3-Hexen-1-ol     | C <sub>6</sub> H <sub>12</sub> O              | 100.2 | 866.9  | 243.374  | 1.23957   | Alcohols | 542.42 ±         | 567.47 ±  | 612.00 ±  | 766.70 ±  | 804.38 ±         | 1135.88 ±       | 1092.52 ± |                 |
|     |                      |                                               |       |        |          |           |          | 33.75d           | 34.66d    | 18.12c    | 6.53b     | 15.55b           | 23.00a          | 32.23a    |                 |
| #68 | Pentan-1-ol-M        | C <sub>5</sub> H <sub>12</sub> O              | 88.1  | 762.7  | 190.332  | 1.25248   | Alcohols | 390.45 ±         | 368.40 ±  | 295.79 ±  | 139.40 ±  | 159.42 ± 4.50e   | 217.80 ±        | 224.22 ±  | Monomer         |
|     |                      |                                               |       |        |          |           |          | 5.60a            | 7.50b     | 6.74c     | 0.10f     |                  | 5.47d           | 7.92d     |                 |
| #78 | Pentan-1-ol-D        | C <sub>5</sub> H <sub>12</sub> O              | 88.1  | 762.9  | 190.397  | 1.50823   | Alcohols | 620.69 ±         | 808.90 ±  | 651.11 ±  | 285.62 ±  | 266.76 ±         | 112.65 ±        | 161.01 ±  | Dimer           |
|     |                      |                                               |       |        |          |           |          | 17.54c           | 18.55a    | 30.01b    | 4.80d     | 9.91d            | 3.86f           | 11.22e    |                 |
| #79 | 3-Methylbutan-1-ol-D | C <sub>5</sub> H <sub>12</sub> O              | 88.1  | 727.3  | 175.966  | 1.48408   | Alcohols | 146.14 ±         | 203.68 ±  | 198.25 ±  | 124.35 ±  | 103.49 ±         | 26.15 ±         | 22.37 ±   | Dimer           |
|     |                      |                                               |       |        |          |           |          | 2.20b            | 3.72a     | 6.58a     | 2.23c     | 3.93d            | 1.28e           | 0.27e     |                 |
| #82 | 2-Methyl-1-propanol  | C <sub>4</sub> H <sub>10</sub> O              | 74.1  | 624    | 142.881  | 1.36641   | Alcohols | 417.28 ±         | 707.02 ±  | 584.19 ±  | 193.18 ±  | 165.94 ± 3.31e   | 59.88 ±         | 39.28 ±   |                 |
|     |                      |                                               |       |        |          |           |          | 9.68c            | 22.53a    | 8.70b     | 0.85d     |                  | 7.50f           | 2.11g     |                 |
| #91 | 3-Methylbutan-1-ol-M | C <sub>5</sub> H <sub>12</sub> O              | 88.1  | 729.8  | 176.98   | 1.24282   | Alcohols | 38.10 ±          | 37.30 ±   | 37.84 ±   | 42.45 ±   | 54.20 ± 1.95a    | 33.31 ±         | 32.05 ±   | Monomer         |
|     |                      |                                               |       |        |          |           |          | 5.38bc           | 2.05bc    | 1.67bc    | 1.61b     |                  | 0.78cd          | 2.27d     |                 |

|     |                        |                                  |       |            |         |         |           |                     |                     |                     |                     |                     |                     |                    |              |
|-----|------------------------|----------------------------------|-------|------------|---------|---------|-----------|---------------------|---------------------|---------------------|---------------------|---------------------|---------------------|--------------------|--------------|
| #92 | 2-Methylbutan-1-ol-M   | C <sub>5</sub> H <sub>12</sub> O | 88.1  | 732.4      | 178.047 | 1.22947 | Alcohols  | 9.43 ± 3.01bc       | 14.41 ±<br>0.39a    | 13.72 ± 0.60a       | 10.66 ±<br>0.67b    | 9.79 ± 0.23b        | 8.85 ±<br>0.90bc    | 7.15 ±<br>1.01c    | Monomer      |
| #93 | Pentan-2-ol            | C <sub>5</sub> H <sub>12</sub> O | 88.1  | 711.6      | 169.626 | 1.45245 | Alcohols  | 50.08 ± 4.16c       | 39.33 ±<br>2.68c    | 83.04 ± 0.50b       | 318.04 ±<br>12.48a  | 303.48 ±<br>15.30a  | 42.70 ±<br>2.87c    | 24.57 ±<br>4.34d   |              |
| #96 | tert-Butanol           | C <sub>4</sub> H <sub>10</sub> O | 74.1  | 508.9      | 111.816 | 1.14369 | Alcohols  | 205.17 ±<br>14.14d  | 287.84 ±<br>4.32c   | 290.77 ±<br>7.36c   | 346.03 ±<br>20.33b  | 502.28 ± 3.61a      | 363.08 ±<br>19.92b  | 134.52 ±<br>6.70e  |              |
| #97 | n-Hexanol              | C <sub>6</sub> H <sub>14</sub> O | 102.2 | 873.8      | 247.073 | 1.32819 | Alcohols  | 306.55 ±<br>9.83b   | 394.72 ±<br>5.82a   | 233.06 ±<br>6.00d   | 234.77 ±<br>3.66d   | 251.96 ± 3.78c      | 242.72 ±<br>10.14cd | 205.00 ±<br>6.66e  |              |
| #98 | 2-Methylbutan-1-ol-D   | C <sub>5</sub> H <sub>12</sub> O | 88.1  | 724.2      | 174.74  | 1.46541 | Alcohols  | 110.32 ±<br>0.75b   | 139.30 ±<br>11.07a  | 139.68 ±<br>4.67a   | 115.55 ±<br>5.65b   | 85.93 ± 2.30c       | 21.28 ±<br>1.06d    | 22.55 ±<br>3.38d   | Dimer        |
| #12 | (E, E)-2,4-Heptadienal | C <sub>7</sub> H <sub>10</sub> O | 110.2 | 1011.<br>1 | 366.97  | 1.19696 | Aldehydes | 242.65 ±<br>10.58e  | 369.57 ±<br>8.33c   | 503.59 ±<br>26.27b  | 463.64 ±<br>42.30b  | 696.06 ±<br>45.22a  | 497.47 ±<br>12.90b  | 291.73 ±<br>4.72d  |              |
| #20 | Benzaldehyde-M         | C <sub>7</sub> H <sub>6</sub> O  | 106.1 | 957.1      | 312.341 | 1.14868 | Aldehydes | 1624.48 ±<br>22.83b | 1660.72 ±<br>7.69a  | 1445.84 ±<br>8.64c  | 713.06 ±<br>13.04ef | 735.44 ±<br>22.34e  | 697.23 ±<br>2.37f   | 1208.33 ±<br>4.81d | Monomer      |
| #21 | Benzaldehyde-D         | C <sub>7</sub> H <sub>6</sub> O  | 106.1 | 957.1      | 312.341 | 1.46512 | Aldehydes | 4647.47 ±<br>55.90a | 4610.32 ±<br>16.57a | 2960.66 ±<br>59.22b | 343.06 ±<br>15.73d  | 339.22 ±<br>10.67d  | 231.70 ±<br>5.90e   | 831.77 ±<br>7.93c  | Dimer        |
| #25 | Heptanal-M             | C <sub>7</sub> H <sub>14</sub> O | 114.2 | 899.4      | 263.11  | 1.3379  | Aldehydes | 334.58 ±<br>8.14g   | 429.66 ±<br>9.06c   | 353.94 ± 0.53f      | 390.10 ±<br>7.69e   | 407.33 ±<br>6.54d   | 636.53 ±<br>12.39a  | 524.25 ±<br>8.14b  | Monomer      |
| #26 | Heptanal-D             | C <sub>7</sub> H <sub>14</sub> O | 114.2 | 898.8      | 262.531 | 1.69914 | Aldehydes | 333.20 ±<br>7.62e   | 678.68 ±<br>21.98b  | 528.88 ±<br>19.97d  | 539.89 ±<br>22.51d  | 571.95 ±<br>20.66cd | 970.29 ±<br>43.51a  | 612.64 ±<br>24.27c | Dimer        |
| #33 | (E)-Hept-2-enal        | C <sub>7</sub> H <sub>12</sub> O | 112.2 | 951.1      | 307.204 | 1.25402 | Aldehydes | 59.98 ± 3.40c       | 56.69 ±<br>0.57c    | 73.66 ± 1.66b       | 62.28 ±<br>4.04c    | 93.81 ± 5.49a       | 68.17 ±<br>3.56b    | 28.89 ±<br>2.59d   | Unidentified |
| #42 | Octanal                | C <sub>8</sub> H <sub>16</sub> O | 128.2 | 1004.<br>1 | 356.92  | 1.4119  | Aldehydes | 77.12 ± 6.58c       | 100.09 ±<br>5.82ab  | 107.24 ±<br>5.83a   | 42.31 ±<br>0.44d    | 44.50 ± 3.92d       | 103.55 ±<br>7.81ab  | 96.77 ±<br>4.05b   |              |
| #45 | Nonanal                | C <sub>9</sub> H <sub>18</sub> O | 142.2 | 1107.<br>6 | 505.747 | 1.4811  | Aldehydes | 260.91 ±<br>16.71c  | 217.58 ±<br>14.43d  | 240.52 ±<br>5.27cd  | 169.26 ±<br>13.46e  | 187.61 ± 9.40e      | 398.32 ±<br>21.96a  | 370.41 ±<br>17.11b |              |

|     |                        |                                                |       |       |         |         |           |           |           |                |           |                |           |           |         |
|-----|------------------------|------------------------------------------------|-------|-------|---------|---------|-----------|-----------|-----------|----------------|-----------|----------------|-----------|-----------|---------|
| #49 | Hexanal-M              | C <sub>6</sub> H <sub>12</sub> O               | 100.2 | 790   | 202.166 | 1.26454 | Aldehydes | 375.24 ±  | 364.57 ±  | 357.82 ± 3.54f | 404.74 ±  | 379.42 ±       | 654.44 ±  | 505.86 ±  | Monomer |
|     |                        |                                                |       |       |         |         |           | 4.56de    | 7.35ef    |                | 8.94c     | 3.64d          | 5.20a     | 8.75b     |         |
| #50 | Hexanal-D              | C <sub>6</sub> H <sub>12</sub> O               | 100.2 | 791.6 | 203.03  | 1.56406 | Aldehydes | 558.22 ±  | 524.33 ±  | 691.35 ±       | 1560.52 ± | 1602.18 ±      | 1649.07 ± | 1034.17 ± | Dimer   |
|     |                        |                                                |       |       |         |         |           | 40.85e    | 7.97e     | 11.25d         | 25.34b    | 14.51ab        | 48.68a    | 13.45c    |         |
| #52 | (E)-2-Pentenal-M       | C <sub>5</sub> H <sub>8</sub> O                | 84.1  | 750   | 185.17  | 1.10704 | Aldehydes | 167.83 ±  | 126.74 ±  | 200.59 ±       | 373.04 ±  | 385.83 ± 0.95c | 572.04 ±  | 493.03 ±  | Monomer |
|     |                        |                                                |       |       |         |         |           | 4.40f     | 2.40g     | 6.52e          | 4.63d     |                | 9.32a     | 13.92b    |         |
| #53 | (E)-2-Pentenal-D       | C <sub>5</sub> H <sub>8</sub> O                | 84.1  | 748.8 | 184.703 | 1.36125 | Aldehydes | 659.10 ±  | 597.51 ±  | 1193.92 ±      | 1394.62 ± | 1624.23 ±      | 787.80 ±  | 689.54 ±  | Dimer   |
|     |                        |                                                |       |       |         |         |           | 41.11e    | 22.76f    | 2.38c          | 40.34b    | 33.64a         | 2.13d     | 9.71e     |         |
| #57 | Pentanal-M             | C <sub>5</sub> H <sub>10</sub> O               | 86.1  | 695   | 162.869 | 1.18413 | Aldehydes | 119.99 ±  | 107.49 ±  | 70.67 ± 2.68e  | 84.38 ±   | 81.81 ± 2.78d  | 194.45 ±  | 120.06 ±  | Monomer |
|     |                        |                                                |       |       |         |         |           | 1.34b     | 4.36c     |                | 3.08d     |                | 0.81a     | 2.82b     |         |
| #58 | Pentanal-D             | C <sub>5</sub> H <sub>10</sub> O               | 86.1  | 693   | 162.078 | 1.4225  | Aldehydes | 304.78 ±  | 331.11 ±  | 285.87 ±       | 240.04 ±  | 279.09 ±       | 353.63 ±  | 144.13 ±  | Dimer   |
|     |                        |                                                |       |       |         |         |           | 12.88c    | 3.06b     | 3.11d          | 4.02e     | 11.97d         | 15.88a    | 7.03f     |         |
| #59 | 2-Methylbutanal        | C <sub>5</sub> H <sub>10</sub> O               | 86.1  | 660.9 | 152.809 | 1.39939 | Aldehydes | 1905.56 ± | 2362.14 ± | 2271.56 ±      | 2454.12 ± | 2369.34 ±      | 2975.94 ± | 3139.16 ± |         |
|     |                        |                                                |       |       |         |         |           | 17.68f    | 18.97d    | 19.60e         | 16.13c    | 8.06d          | 46.82b    | 43.45a    |         |
| #60 | 3-Methylbutanal        | C <sub>5</sub> H <sub>10</sub> O               | 86.1  | 640.5 | 147.308 | 1.41143 | Aldehydes | 1289.39 ± | 1516.07 ± | 1502.55 ±      | 1697.11 ± | 1581.10 ±      | 1814.31 ± | 1944.14 ± |         |
|     |                        |                                                |       |       |         |         |           | 42.46f    | 5.94e     | 14.43e         | 9.25c     | 15.29d         | 33.62b    | 9.08a     |         |
| #64 | Butanal                | C <sub>4</sub> H <sub>8</sub> O                | 72.1  | 548.7 | 122.555 | 1.28401 | Aldehydes | 1124.16 ± | 1538.96 ± | 1745.00 ±      | 1532.83 ± | 1304.15 ±      | 1294.82 ± | 1405.48 ± |         |
|     |                        |                                                |       |       |         |         |           | 35.30e    | 38.81b    | 26.93a         | 20.39b    | 6.62d          | 43.71d    | 120.81c   |         |
| #76 | 2-Methyl-2-pentenal-D  | C <sub>6</sub> H <sub>10</sub> O               | 98.1  | 823   | 219.874 | 1.49791 | Aldehydes | 405.34 ±  | 608.65 ±  | 534.71 ±       | 65.08 ±   | 98.58 ± 4.79d  | 34.42 ±   | 53.69 ±   | Dimer   |
|     |                        |                                                |       |       |         |         |           | 27.22c    | 21.67a    | 16.00b         | 2.81e     |                | 3.37f     | 2.80ef    |         |
| #81 | 2-Methyl-2-pentenal-M  | C <sub>6</sub> H <sub>10</sub> O               | 98.1  | 822.2 | 219.396 | 1.16162 | Aldehydes | 118.81 ±  | 138.54 ±  | 125.03 ±       | 50.20 ±   | 59.32 ± 1.21d  | 33.27 ±   | 34.00 ±   | Monomer |
|     |                        |                                                |       |       |         |         |           | 5.42c     | 2.37a     | 4.64b          | 3.39e     |                | 1.78f     | 1.61f     |         |
| #1  | (Z)-3-Hexenyl butyrate | C <sub>10</sub> H <sub>18</sub> O <sub>2</sub> | 170.3 | 1240. | 696.712 | 1.43164 | Esters    | 100.06 ±  | 122.72 ±  | 251.05 ±       | 364.28 ±  | 364.96 ±       | 170.21 ±  | 208.81 ±  |         |
|     |                        |                                                |       | 4     |         |         |           | 5.19e     | 5.08e     | 20.48b         | 10.29a    | 28.79a         | 2.46d     | 15.50c    |         |
| #2  | Methyl Salicylate      | C <sub>8</sub> H <sub>8</sub> O <sub>3</sub>   | 152.1 | 1230. | 681.86  | 1.20064 | Esters    | 349.49 ±  | 990.68 ±  | 1501.37 ±      | 1559.08 ± | 1886.24 ±      | 925.23 ±  | 1673.94 ± |         |
|     |                        |                                                |       | 1     |         |         |           | 51.70e    | 54.19d    | 58.96c         | 94.92bc   | 53.57a         | 121.12d   | 20.71b    |         |

|     |                                                |                                               |       |        |         |         |        |               |           |               |           |                |           |           |         |
|-----|------------------------------------------------|-----------------------------------------------|-------|--------|---------|---------|--------|---------------|-----------|---------------|-----------|----------------|-----------|-----------|---------|
| #14 | Butanoic acid, 2-ethyl-3-methyl, ethyl ester-M | C <sub>9</sub> H <sub>18</sub> O <sub>2</sub> | 158.2 | 981    | 332.671 | 1.38724 | Esters | 1377.86 ±     | 1361.29 ± | 1405.68 ±     | 1818.18 ± | 1255.55 ±      | 2324.57 ± | 2150.03 ± | Monomer |
|     |                                                |                                               |       |        |         |         |        | 34.04de       | 7.62e     | 13.21d        | 20.25c    | 45.35f         | 8.38a     | 11.66b    |         |
| #15 | Butanoic acid, 2-ethyl-3-methyl, ethyl ester-D | C <sub>9</sub> H <sub>18</sub> O <sub>2</sub> | 158.2 | 982.3  | 333.802 | 1.82352 | Esters | 2385.39 ±     | 3684.75 ± | 3345.28 ±     | 1902.76 ± | 608.70 ±       | 2227.20 ± | 3164.57 ± | Dimer   |
|     |                                                |                                               |       |        |         |         |        | 55.11d        | 33.84a    | 38.72b        | 99.91f    | 41.12g         | 91.34e    | 107.40c   |         |
| #22 | Ethyl 3-hydroxybutanoate                       | C <sub>6</sub> H <sub>12</sub> O <sub>3</sub> | 132.2 | 938.1  | 296.123 | 1.17298 | Esters | 317.60 ±      | 336.74 ±  | 315.70 ±      | 590.82 ±  | 767.55 ± 8.07a | 140.09 ±  | 83.41 ±   |         |
|     |                                                |                                               |       |        |         |         |        | 6.59d         | 2.84c     | 10.19d        | 10.50b    |                | 9.67e     | 5.97f     |         |
| #23 | Hexyl formate-M                                | C <sub>7</sub> H <sub>14</sub> O <sub>2</sub> | 130.2 | 921.5  | 281.934 | 1.28921 | Esters | 73.47 ± 2.00f | 78.00 ±   | 229.27 ±      | 994.01 ±  | 1025.64 ±      | 555.54 ±  | 520.70 ±  | Monomer |
|     |                                                |                                               |       |        |         |         |        |               | 1.90f     | 6.93e         | 10.54b    | 22.00a         | 9.02c     | 6.95d     |         |
| #24 | Hexyl formate-D                                | C <sub>7</sub> H <sub>14</sub> O <sub>2</sub> | 130.2 | 920.1  | 280.775 | 1.6803  | Esters | 53.15 ± 5.17f | 56.22 ±   | 202.21 ±      | 2435.46 ± | 2132.44 ±      | 263.14 ±  | 292.17 ±  | Dimer   |
|     |                                                |                                               |       |        |         |         |        |               | 2.42f     | 2.96e         | 31.66a    | 26.51b         | 4.02d     | 6.71c     |         |
| #44 | Ethyl hexanoate                                | C <sub>8</sub> H <sub>16</sub> O <sub>2</sub> | 144.2 | 1001.7 | 353.466 | 1.3425  | Esters | 35.90 ± 3.07c | 22.92 ±   | 26.57 ±       | 80.44 ±   | 58.40 ± 3.47b  | 27.76 ±   | 29.39 ±   |         |
|     |                                                |                                               |       |        |         |         |        |               | 2.22e     | 1.05de        | 4.39a     |                | 2.19de    | 1.35d     |         |
| #55 | n-Propyl acetate-D                             | C <sub>5</sub> H <sub>10</sub> O <sub>2</sub> | 102.1 | 707    | 167.771 | 1.47689 | Esters | 130.17 ±      | 84.81 ±   | 144.72 ±      | 1042.50 ± | 1047.13 ±      | 327.49 ±  | 159.36 ±  | Dimer   |
|     |                                                |                                               |       |        |         |         |        | 5.23d         | 1.04e     | 7.00cd        | 23.96a    | 11.37a         | 24.95b    | 15.73c    |         |
| #56 | n-Propyl acetate-M                             | C <sub>5</sub> H <sub>10</sub> O <sub>2</sub> | 102.1 | 706.7  | 167.613 | 1.16446 | Esters | 101.31 ±      | 101.55 ±  | 86.60 ± 2.18e | 139.08 ±  | 149.82 ± 3.98b | 170.10 ±  | 98.83 ±   | Monomer |
|     |                                                |                                               |       |        |         |         |        | 4.58d         | 4.20d     |               | 2.03c     |                | 5.97a     | 3.73d     |         |
| #61 | Ethyl Acetate                                  | C <sub>4</sub> H <sub>8</sub> O <sub>2</sub>  | 88.1  | 608.4  | 138.664 | 1.33719 | Esters | 983.29 ±      | 781.11 ±  | 1239.55 ±     | 4427.55 ± | 4493.10 ±      | 2900.81 ± | 661.58 ±  |         |
|     |                                                |                                               |       |        |         |         |        | 5.26d         | 10.65e    | 12.18c        | 46.08a    | 60.38a         | 125.47b   | 26.40f    |         |
| #66 | Methyl acetate                                 | C <sub>3</sub> H <sub>6</sub> O <sub>2</sub>  | 74.1  | 537    | 119.411 | 1.19298 | Esters | 2076.91 ±     | 3281.93 ± | 3462.17 ±     | 3156.05 ± | 2778.39 ±      | 2579.62 ± | 2794.58 ± |         |
|     |                                                |                                               |       |        |         |         |        | 41.91e        | 51.25b    | 82.82a        | 105.14b   | 20.20c         | 142.72d   | 150.64c   |         |
| #77 | Methyl valerate                                | C <sub>6</sub> H <sub>12</sub> O <sub>2</sub> | 116.2 | 825.4  | 221.138 | 1.564   | Esters | 184.58 ±      | 265.38 ±  | 229.94 ±      | 85.13 ±   | 112.33 ±       | 26.46 ±   | 22.74 ±   |         |
|     |                                                |                                               |       |        |         |         |        | 3.42c         | 11.24a    | 8.01b         | 4.75e     | 7.51d          | 2.25f     | 0.97f     |         |
| #84 | Methyl butyrate-D                              | C <sub>5</sub> H <sub>10</sub> O <sub>2</sub> | 102.1 | 715.5  | 171.206 | 1.42264 | Esters | 223.70 ±      | 223.49 ±  | 346.64 ±      | 724.64 ±  | 490.30 ± 8.65b | 137.54 ±  | 124.28 ±  | Dimer   |
|     |                                                |                                               |       |        |         |         |        | 12.91d        | 8.60d     | 2.97c         | 12.16a    |                | 5.71e     | 7.93e     |         |

|      |                                |                                                |       |        |         |         |                  |                 |                  |                  |                   |                   |                  |                   |         |
|------|--------------------------------|------------------------------------------------|-------|--------|---------|---------|------------------|-----------------|------------------|------------------|-------------------|-------------------|------------------|-------------------|---------|
| #87  | Methyl 3-methylbutanoate       | C <sub>6</sub> H <sub>12</sub> O <sub>2</sub>  | 116.2 | 768.2  | 192.552 | 1.53234 | Esters           | 47.29 ± 2.46e   | 72.17 ± 3.35c    | 81.77 ± 5.22b    | 131.89 ± 0.95a    | 60.74 ± 1.90d     | 9.83 ± 1.35f     | 11.66 ± 2.73f     | Monomer |
| #88  | Methyl butyrate-M              | C <sub>5</sub> H <sub>10</sub> O <sub>2</sub>  | 102.1 | 717.2  | 171.868 | 1.15016 | Esters           | 56.82 ± 3.08g   | 64.72 ± 2.38f    | 102.63 ± 1.25c   | 247.44 ± 3.64a    | 203.00 ± 2.20b    | 93.22 ± 4.79d    | 75.80 ± 3.47e     |         |
| #89  | Butyl acetate-M                | C <sub>6</sub> H <sub>12</sub> O <sub>2</sub>  | 116.2 | 803.5  | 209.421 | 1.23849 | Esters           | 58.56 ± 1.11d   | 50.87 ± 1.15e    | 58.60 ± 0.93d    | 95.98 ± 1.46a     | 70.73 ± 4.66c     | 78.65 ± 2.04b    | 75.99 ± 1.71b     |         |
| #100 | Butyl acetate-D                | C <sub>6</sub> H <sub>12</sub> O <sub>2</sub>  | 116.2 | 802.5  | 208.857 | 1.61975 | Esters           | 9.75 ± 0.12d    | 10.27 ± 0.69d    | 11.89 ± 0.61d    | 76.35 ± 2.10a     | 75.03 ± 2.69a     | 24.36 ± 0.50b    | 14.98 ± 0.59c     | Dimer   |
| #4   | <i>trans</i> -Linalool oxide-M | C <sub>10</sub> H <sub>18</sub> O <sub>2</sub> | 170.3 | 1084   | 471.749 | 1.2622  | Heterocycle<br>s | 758.03 ± 44.00e | 1825.64 ± 37.04c | 2009.57 ± 68.25a | 1874.56 ± 59.01bc | 1956.22 ± 22.98ab | 1316.65 ± 36.34d | 1900.77 ± 54.92bc | Monomer |
| #5   | <i>trans</i> -Linalool oxide-D | C <sub>10</sub> H <sub>18</sub> O <sub>2</sub> | 170.3 | 1083.7 | 471.372 | 1.81672 | Heterocycle<br>s | 161.61 ± 27.97d | 702.53 ± 40.82b  | 961.05 ± 46.39a  | 661.56 ± 36.27b   | 680.84 ± 21.23b   | 297.56 ± 22.04c  | 672.22 ± 46.71b   |         |
| #6   | 2,3-Dimethyl-5-ethylpyrazine   | C <sub>8</sub> H <sub>12</sub> N <sub>2</sub>  | 136.2 | 1069.3 | 450.642 | 1.23366 | Heterocycle<br>s | 738.73 ± 33.66a | 678.81 ± 25.98b  | 743.55 ± 16.90a  | 430.63 ± 15.39d   | 584.38 ± 31.71c   | 253.16 ± 29.35e  | 212.85 ± 10.48e   | Monomer |
| #7   | <i>cis</i> -Linalool Oxide-M   | C <sub>10</sub> H <sub>18</sub> O <sub>2</sub> | 170.3 | 1065.4 | 444.989 | 1.25948 | Heterocycle<br>s | 300.43 ± 9.25d  | 810.65 ± 17.82ab | 815.78 ± 26.51ab | 793.01 ± 36.69ab  | 820.78 ± 10.40a   | 504.27 ± 23.63c  | 775.16 ± 18.81b   |         |
| #8   | <i>cis</i> -Linalool Oxide-D   | C <sub>10</sub> H <sub>18</sub> O <sub>2</sub> | 170.3 | 1065.9 | 445.742 | 1.81129 | Heterocycle<br>s | 56.73 ± 8.38f   | 207.18 ± 22.20b  | 230.27 ± 8.85a   | 132.15 ± 8.21d    | 153.79 ± 15.82c   | 56.70 ± 4.56f    | 92.27 ± 4.28e     |         |
| #17  | 2-Pentyl furan                 | C <sub>9</sub> H <sub>14</sub> O               | 138.2 | 993.1  | 343.037 | 1.25129 | Heterocycle<br>s | 218.00 ± 5.89d  | 199.92 ± 4.88e   | 258.79 ± 4.33b   | 240.07 ± 5.53c    | 357.34 ± 11.77a   | 135.28 ± 4.67f   | 193.31 ± 3.43e    | Monomer |
| #29  | 2-Acetylfuran                  | C <sub>6</sub> H <sub>6</sub> O <sub>2</sub>   | 110.1 | 907.9  | 270.326 | 1.11836 | Heterocycle<br>s | 63.26 ± 3.84d   | 53.14 ± 2.94e    | 76.90 ± 3.80c    | 97.47 ± 7.49b     | 106.64 ± 2.30a    | 63.65 ± 1.18d    | 93.89 ± 4.24b     |         |
| #47  | Furfural-M                     | C <sub>5</sub> H <sub>4</sub> O <sub>2</sub>   | 96.1  | 825.8  | 221.326 | 1.08524 | Heterocycle<br>s | 79.21 ± 8.50b   | 53.94 ± 3.63c    | 68.96 ± 4.18b    | 50.83 ± 1.90c     | 56.60 ± 6.89c     | 71.28 ± 9.23b    | 489.96 ± 7.22a    |         |
| #48  | Furfural-D                     | C <sub>5</sub> H <sub>4</sub> O <sub>2</sub>   | 96.1  | 824.7  | 220.75  | 1.33466 | Heterocycle<br>s | 87.51 ± 8.64b   | 61.26 ± 3.44c    | 84.86 ± 4.07b    | 24.09 ± 3.65d     | 21.81 ± 1.82d     | 23.31 ± 1.38d    | 227.41 ± 3.07a    | Dimer   |

|     |                            |                                              |       |       |         |         |         |                        |                      |                     |                      |                     |                     |                      |       |
|-----|----------------------------|----------------------------------------------|-------|-------|---------|---------|---------|------------------------|----------------------|---------------------|----------------------|---------------------|---------------------|----------------------|-------|
| #13 | Methyl-5-hepten-2-one      | C <sub>8</sub> H <sub>14</sub> O             | 126.2 | 990.2 | 340.586 | 1.17521 | Ketones | 4850.83 ±<br>184.15a   | 4906.21 ±<br>41.21a  | 3800.81 ±<br>71.72b | 2077.25 ±<br>53.39d  | 2425.70 ±<br>42.15c | 667.94 ±<br>27.70f  | 836.22 ±<br>27.87e   |       |
| #31 | 2-Heptanone-M              | C <sub>7</sub> H <sub>14</sub> O             | 114.2 | 890.7 | 256.143 | 1.26224 | Ketones | 136.77 ±<br>4.75e      | 186.67 ±<br>1.85bc   | 154.40 ±<br>3.70d   | 156.16 ±<br>4.05d    | 182.35 ± 4.44c      | 200.17 ±<br>4.86a   | 190.94 ±<br>2.13b    |       |
| #35 | 2-Heptanone-D              | C <sub>7</sub> H <sub>14</sub> O             | 114.2 | 887.4 | 254.37  | 1.62948 | Ketones | 274.99 ±<br>12.97c     | 409.58 ±<br>7.32a    | 358.34 ±<br>10.02b  | 105.49 ±<br>5.78e    | 206.92 ±<br>1.47d   | 36.60 ±<br>3.94g    | 75.86 ±<br>5.85f     | Dimer |
| #39 | Dihydro-2(3h)-<br>furanone | C <sub>4</sub> H <sub>6</sub> O <sub>2</sub> | 86.1  | 919.2 | 279.956 | 1.07948 | Ketones | 226.80 ±<br>27.33b     | 183.03 ±<br>5.67c    | 148.99 ±<br>5.12d   | 78.10 ±<br>5.98e     | 79.47 ± 7.04e       | 155.05 ±<br>10.81d  | 327.73 ±<br>1.80a    |       |
| #51 | Mesityl oxide              | C <sub>6</sub> H <sub>10</sub> O             | 98.1  | 790   | 202.166 | 1.44485 | Ketones | 3501.78 ±<br>32.03a    | 3520.86 ±<br>63.25a  | 2572.35 ±<br>46.44b | 574.98 ±<br>6.25c    | 601.05 ± 6.19c      | 467.39 ±<br>3.43d   | 610.79 ±<br>13.40c   |       |
| #63 | 2-Butanone                 | C <sub>4</sub> H <sub>8</sub> O              | 72.1  | 583.6 | 131.984 | 1.24689 | Ketones | 3792.82 ±<br>29.72a    | 3812.36 ±<br>126.06a | 3417.91 ±<br>38.76b | 2691.36 ±<br>42.46c  | 2625.41 ±<br>14.11c | 487.81 ±<br>23.00e  | 1900.21 ±<br>62.67d  |       |
| #71 | 3-Hydroxybutan-2-one       | C <sub>4</sub> H <sub>8</sub> O <sub>2</sub> | 88.1  | 711.8 | 169.704 | 1.05584 | Ketones | 102.06 ±<br>6.05c      | 104.29 ±<br>2.36c    | 101.43 ±<br>4.58c   | 42.49 ±<br>0.51e     | 53.84 ± 4.65d       | 163.49 ±<br>1.91b   | 233.85 ±<br>3.18a    |       |
| #73 | (E)-3-Penten-2-one         | C <sub>5</sub> H <sub>8</sub> O              | 84.1  | 737   | 179.92  | 1.09113 | Ketones | 47.88 ± 2.32b<br>0.39e | 29.23 ±<br>0.39e     | 33.57 ± 0.78d       | 40.88 ±<br>0.25c     | 41.12 ± 2.24c       | 29.65 ±<br>0.71e    | 54.01 ±<br>1.30a     |       |
| #83 | 3-Pentanone                | C <sub>5</sub> H <sub>10</sub> O             | 86.1  | 694.6 | 162.724 | 1.35332 | Ketones | 155.50 ±<br>5.27d      | 157.30 ±<br>4.08d    | 265.18 ±<br>3.34a   | 216.20 ±<br>3.25b    | 164.58 ± 4.48c      | 59.64 ±<br>1.98f    | 70.18 ±<br>1.30e     |       |
| #86 | 2-Hexanone                 | C <sub>6</sub> H <sub>12</sub> O             | 100.2 | 791.2 | 202.794 | 1.5026  | Ketones | 221.88 ±<br>15.77bc    | 235.16 ±<br>7.97ab   | 238.55 ± a          | 211.82 ±<br>4.25c    | 175.61 ±<br>7.22d   | 97.43 ±<br>3.72e    | 181.93 ±<br>9.11d    |       |
| #94 | Acetone                    | C <sub>3</sub> H <sub>6</sub> O              | 58.1  | 488.6 | 106.359 | 1.11507 | Ketones | 10415.09 ±<br>113.11a  | 9632.76 ±<br>43.85b  | 8936.56 ±<br>20.67c | 8070.92 ±<br>110.72d | 7773.82 ±<br>33.39e | 4016.98 ±<br>55.74g | 5033.12 ±<br>148.60f |       |
| #95 | Cyclopentanone             | C <sub>5</sub> H <sub>8</sub> O              | 84.1  | 785   | 199.494 | 1.33634 | Ketones | 137.55 ±<br>6.99b      | 123.94 ±<br>3.69c    | 116.32 ±<br>0.88c   | 101.32 ±<br>2.82d    | 101.24 ±<br>2.64d   | 175.35 ±<br>1.53a   | 123.95 ±<br>7.03c    |       |
| #99 | 2-Pentanone                | C <sub>5</sub> H <sub>10</sub> O             | 86.1  | 689.3 | 160.591 | 1.37061 | Ketones | 91.89 ± 2.77a<br>6.97c | 75.08 ±<br>6.97c     | 95.80 ± 0.64a       | 79.23 ±<br>0.65bc    | 83.79 ± 2.48b       | 47.60 ±<br>1.13d    | 17.14 ±<br>0.42e     |       |

|     |                |                                  |       |        |         |         |          |                 |                |                 |                 |                 |                 |                 |              |
|-----|----------------|----------------------------------|-------|--------|---------|---------|----------|-----------------|----------------|-----------------|-----------------|-----------------|-----------------|-----------------|--------------|
| #80 | Ethylsulfide   | C <sub>4</sub> H <sub>10</sub> S | 90.2  | 700.6  | 165.14  | 1.04444 | Sulfides | 231.00 ± 10.86a | 153.32 ± 3.50c | 130.14 ± 3.14de | 191.50 ± 1.39b  | 232.92 ± 11.15a | 119.99 ± 5.97e  | 137.28 ± 3.44d  |              |
| #9  | γ-Terpinene    | C <sub>10</sub> H <sub>16</sub>  | 136.2 | 1051.8 | 425.39  | 1.22278 | Terpenes | 353.01 ± 7.87b  | 225.88 ± 8.28d | 235.10 ± 12.31d | 332.22 ± 2.38c  | 405.93 ± 17.93a | 99.37 ± 5.61e   | 109.56 ± 3.89e  |              |
| #19 | α-Phellandrene | C <sub>10</sub> H <sub>16</sub>  | 136.2 | 1001.5 | 353.049 | 1.22014 | Terpenes | 29.67 ± 0.37e   | 36.61 ± 1.72d  | 46.45 ± 4.28c   | 72.89 ± 4.41b   | 89.94 ± 4.00a   | 42.13 ± 2.71cd  | 45.04 ± 4.16c   |              |
| #27 | α-Fenchene     | C <sub>10</sub> H <sub>16</sub>  | 136.2 | 938.8  | 296.703 | 1.21853 | Terpenes | 59.41 ± 1.96d   | 70.89 ± 4.66c  | 60.06 ± 2.10d   | 124.36 ± 4.81b  | 176.55 ± 2.79a  | 49.30 ± 2.61e   | 35.89 ± 2.62f   |              |
| #10 | 1              | /                                | /     | 1037.3 | 404.66  | 1.45519 |          | 314.09 ± 14.77a | 244.12 ± 8.49c | 229.29 ± 11.62c | 280.79 ± 3.34b  | 300.53 ± 8.61a  | 183.80 ± 17.38d | 167.19 ± 5.87d  | Unidentified |
| #11 | 2              | /                                | /     | 1026.9 | 389.584 | 1.24453 |          | 465.38 ± 11.92c | 318.84 ± 4.35f | 373.39 ± 2.17e  | 645.57 ± 12.63b | 701.92 ± 14.75a | 271.29 ± 4.71g  | 432.90 ± 16.84d | Unidentified |
| #16 | 3              | /                                | /     | 986    | 336.956 | 1.76743 |          | 589.83 ± 5.59b  | 686.70 ± 1.13a | 598.33 ± 8.05b  | 282.72 ± 6.15c  | 205.20 ± 15.82d | 114.18 ± 7.83f  | 179.94 ± 3.81e  | Unidentified |
| #18 | 4              | /                                | /     | 999.1  | 349.637 | 1.20362 |          | 45.83 ± 3.21d   | 52.23 ± 0.93d  | 67.84 ± 8.37c   | 92.68 ± 11.12b  | 155.93 ± 3.96a  | 92.73 ± 6.27b   | 22.92 ± 1.80e   | Unidentified |
| #28 | 5              | /                                | /     | 927.8  | 287.347 | 1.19921 |          | 33.96 ± 3.38f   | 53.18 ± 1.01e  | 71.96 ± 2.65d   | 186.02 ± 2.74a  | 172.67 ± 3.43b  | 65.95 ± 3.93d   | 108.72 ± 5.65c  | Unidentified |
| #30 | 6              | /                                | /     | 895    | 259.334 | 1.14439 |          | 60.29 ± 1.51e   | 77.09 ± 2.34d  | 92.33 ± 3.45c   | 163.04 ± 8.29b  | 215.18 ± 3.93a  | 63.01 ± 3.00e   | 52.05 ± 2.63f   | Unidentified |
| #34 | 7              | /                                | /     | 899.2  | 262.88  | 1.60755 |          | 323.13 ± 13.35e | 366.88 ± 2.42d | 426.19 ± 9.05ab | 433.80 ± 7.60ab | 387.35 ± 16.34c | 442.11 ± 2.67a  | 418.06 ± 3.21b  |              |
| #37 | 8              | /                                | /     | 1041.7 | 410.973 | 1.20956 |          | 129.16 ± 30.02a | 36.85 ± 6.58b  | 31.03 ± 5.18b   | 31.29 ± 1.41b   | 41.24 ± 2.75b   | 23.29 ± 0.97b   | 43.27 ± 6.28b   | Unidentified |
| #38 | 9              | /                                | /     | 914.4  | 275.848 | 1.41123 |          | 130.10 ± 19.63a | 108.88 ± 4.90b | 115.33 ± 2.68ab | 41.00 ± 5.64c   | 39.01 ± 3.12c   | 51.29 ± 4.41c   | 103.58 ± 1.32b  | Unidentified |



|     |    |   |   |        |         |         |                  |                  |                 |                  |                 |                 |                 |              |
|-----|----|---|---|--------|---------|---------|------------------|------------------|-----------------|------------------|-----------------|-----------------|-----------------|--------------|
| #40 | 10 | / | / | 1007.5 | 361.799 | 1.82086 | 616.77 ± 58.86a  | 168.78 ± 12.37c  | 239.46 ± 18.12b | 180.46 ± 7.76c   | 99.24 ± 1.58d   | 68.37 ± 11.82d  | 76.60 ± 10.89d  | Unidentified |
| #41 | 11 | / | / | 1009.5 | 364.587 | 1.32981 | 1156.77 ± 12.26a | 728.72 ± 2.16c   | 766.24 ± 32.58b | 713.16 ± 8.36c   | 624.16 ± 26.96d | 284.15 ± 23.29e | 307.28 ± 9.58e  | Unidentified |
| #43 | 12 | / | / | 920.8  | 281.311 | 1.59935 | 164.50 ± 3.37f   | 133.61 ± 2.25g   | 379.38 ± 2.47c  | 593.62 ± 10.19a  | 541.37 ± 4.26b  | 205.78 ± 15.79e | 226.99 ± 6.70d  | Unidentified |
| #54 | 13 | / | / | 732.5  | 178.089 | 1.33282 | 1051.63 ± 56.16a | 642.44 ± 11.53c  | 716.12 ± 21.04b | 319.85 ± 12.98e  | 434.40 ± 10.60d | 106.52 ± 2.67g  | 196.63 ± 9.03f  | Unidentified |
| #62 | 14 | / | / | 596    | 135.324 | 1.28903 | 1427.52 ± 8.44d  | 1025.42 ± 15.62e | 1467.82 ± 4.50c | 1889.59 ± 26.99a | 1851.42 ± 4.07b | 700.14 ± 13.98g | 966.96 ± 30.87f | Unidentified |
| #65 | 15 | / | / | 528.3  | 117.054 | 1.23786 | 137.48 ± 1.33e   | 89.81 ± 1.85f    | 156.96 ± 2.74d  | 288.81 ± 3.42a   | 247.15 ± 0.62b  | 132.75 ± 6.45e  | 176.50 ± 15.75c | Unidentified |
| #67 | 16 | / | / | 740.4  | 181.295 | 1.42896 | 366.31 ± 9.00d   | 544.29 ± 2.68a   | 485.77 ± 7.42b  | 313.04 ± 8.74e   | 397.08 ± 5.92c  | 101.91 ± 6.50g  | 177.26 ± 6.85f  | Unidentified |
| #69 | 17 | / | / | 739.4  | 180.902 | 1.15466 | 33.29 ± 2.67d    | 33.70 ± 1.78d    | 35.61 ± 2.05d   | 68.12 ± 2.96c    | 80.78 ± 3.09b   | 70.45 ± 5.57c   | 93.34 ± 1.58a   | Unidentified |
| #70 | 18 | / | / | 808.2  | 211.942 | 1.1587  | 179.34 ± 5.14b   | 98.98 ± 5.12e    | 124.19 ± 1.20d  | 195.68 ± 2.38a   | 136.50 ± 2.91c  | 59.15 ± 2.78g   | 65.04 ± 1.51f   | Unidentified |
| #72 | 19 | / | / | 734.1  | 178.741 | 1.07197 | 33.72 ± 2.87c    | 9.46 ± 1.45e     | 12.53 ± 1.24e   | 25.48 ± 2.56d    | 35.65 ± 0.94c   | 58.41 ± 1.31a   | 50.06 ± 2.16b   | Unidentified |
| #74 | 20 | / | / | 805.1  | 210.264 | 1.04222 | 355.04 ± 18.51a  | 167.18 ± 3.92d   | 139.91 ± 2.05e  | 248.21 ± 4.30c   | 264.11 ± 5.60b  | 103.21 ± 5.21f  | 149.85 ± 5.93e  | Unidentified |
| #75 | 21 | / | / | 810.3  | 213.051 | 1.48935 | 458.64 ± 11.23a  | 210.09 ± 10.62e  | 300.97 ± 2.61c  | 348.38 ± 10.58b  | 262.37 ± 9.19d  | 51.13 ± 2.51f   | 49.00 ± 2.16f   | Unidentified |
| #85 | 22 | / | / | 767.4  | 192.24  | 1.47719 | 113.23 ± 4.55f   | 170.85 ± 3.18d   | 238.31 ± 4.23c  | 382.54 ± 13.92a  | 355.51 ± 7.00b  | 148.55 ± 4.50e  | 166.38 ± 11.87d | Unidentified |

|     |    |   |   |       |         |         |          |          |          |          |          |         |          |              |
|-----|----|---|---|-------|---------|---------|----------|----------|----------|----------|----------|---------|----------|--------------|
| #90 | 23 | / | / | 827.4 | 222.218 | 1.26542 | 180.96 ± | 202.27 ± | 169.58 ± | 143.22 ± | 175.04 ± | 88.37 ± | 113.99 ± | Unidentified |
|     |    |   |   |       |         |         | 2.51b    | 6.06a    | 0.74c    | 4.28d    | 4.46bc   | 3.68f   | 4.27e    |              |

Data were expressed as mean ± SD (n = 3).

MW represents molecular mass; RI represents relative retention index; Rt represents retention time; Dt represents relative migration time; The suffixe-M represents monomer of volatile components while the suffixe-D represents dimer. Values in a row followed by different letters are significantly different ( $p < 0.05$ ).

**Table S3** Characterization and contents of the volatile compounds of sweet and floral aroma black tea during the entire manufacturing process based on GC-MS.

| No. | Compounds                              | R <sup>t</sup> <sup>a</sup> | RI <sup>b</sup> | RI <sup>c</sup> | ID     | Compound types | Contents (µg/L) |          |         |         |               |         |        | VIP  | Significance |
|-----|----------------------------------------|-----------------------------|-----------------|-----------------|--------|----------------|-----------------|----------|---------|---------|---------------|---------|--------|------|--------------|
|     |                                        |                             |                 |                 |        |                | Fresh           | Witherin | Shakin  | Rollin  | Fermentatio   | First   | Final  |      |              |
|     |                                        |                             |                 |                 |        |                | leaves          | g        | g       | g       | n             | drying  | firing |      |              |
| 7   | 2-Methylbutanol                        | 10.73                       | 711             | 718             | MS, RI | Alcohols       | 0.11 ±          | 0.32 ±   | 0.12 ±  | 0.02 ±  | 0.03 ± 0.00c  | 0.02 ±  | 0.01 ± | 0.96 | 0            |
|     |                                        |                             |                 |                 |        |                | 0.02b           | 0.06a    | 0.03b   | 0.00c   |               | 0.00c   | 0.00c  |      |              |
| 10  | (Z)-2-Pentenol                         | 11.85                       | 747             | 746             | MS, RI | Alcohols       | 0.73 ±          | 2.41 ±   | 2.20 ±  | 1.41 ±  | 1.93 ±        | 1.66 ±  | 1.14 ± | 1.16 | 0            |
|     |                                        |                             |                 |                 |        |                | 0.08e           | 0.42a    | 0.66ab  | 0.08cd  |               | 0.30bcd | 0.10de |      |              |
| 14  | (E)-3-Hexen-1-ol                       | 14.9                        | 844             | 855             | MS, RI | Alcohols       | 43.06 ±         | 31.88 ±  | 26.14 ± | 12.79 ± | 12.10 ± 1.72c | 8.13 ±  | 6.24 ± | 0.98 | 0            |
|     |                                        |                             |                 |                 |        |                | 4.70a           | 4.15b    | 8.15b   | 1.81c   |               | 1.85c   | 0.42c  |      |              |
| 15  | 1-Hexanol                              | 15.28                       | 856             | 858             | MS, RI | Alcohols       | 6.85 ±          | 5.11 ±   | 3.99 ±  | 1.91 ±  | 1.82 ± 0.26c  | 1.31 ±  | 0.93 ± | 0.95 | 0            |
|     |                                        |                             |                 |                 |        |                | 0.79a           | 0.23b    | 1.84b   | 0.18c   |               | 0.28c   | 0.14c  |      |              |
| 19  | 2-Heptanol                             | 16.43                       | 893             | 888             | MS, RI | Alcohols       | 1.47 ±          | 4.88 ±   | 0.44 ±  | 0.34 ±  | 0.45 ± 0.05b  | 0.37 ±  | 0.31 ± | 0.98 | 0.029        |
|     |                                        |                             |                 |                 |        |                | 0.79b           | 4.13a    | 0.18b   | 0.05b   |               | 0.08b   | 0.02b  |      |              |
| 23  | 1-Heptanol                             | 19.11                       | 975             | 970             | MS, RI | Alcohols       | 4.21 ±          | 2.84 ±   | 0.86 ±  | 0.35 ±  | 0.34 ± 0.06d  | 0.28 ±  | 0.24 ± | 0.96 | 0            |
|     |                                        |                             |                 |                 |        |                | 0.58a           | 0.08b    | 0.13c   | 0.04d   |               | 0.07d   | 0.04d  |      |              |
| 24  | 1-Octen-3-ol                           | 19.49                       | 986             | 981             | MS, RI | Alcohols       | 7.36 ±          | 12.51 ±  | 4.60 ±  | 1.93 ±  | 2.31 ± 0.46c  | 1.96 ±  | 1.28 ± | 0.90 | 0            |
|     |                                        |                             |                 |                 |        |                | 1.50b           | 4.19a    | 1.07bc  | 0.22c   |               | 0.62c   | 0.08c  |      |              |
| 33  | 2-Ethyl-1-hexanol                      | 21.36                       | 1031            | 1039            | MS, RI | Alcohols       | 1.09 ±          | 1.78 ±   | 0.74 ±  | 0.34 ±  | 0.34 ± 0.06c  | 0.34 ±  | 0.22 ± | 0.88 | 0            |
|     |                                        |                             |                 |                 |        |                | 0.06b           | 0.69a    | 0.14bc  | 0.03c   |               | 0.11c   | 0.03c  |      |              |
| 37  | 2-Methyl-6-methylene-3,7-octadien-2-ol | 21.57                       | 1037            | /               | MS, RI | Alcohols       | 7.15 ±          | 8.04 ±   | 4.00 ±  | 1.09 ±  | 1.63 ± 0.41c  | 0.91 ±  | 1.17 ± | 0.85 | 0            |
|     |                                        |                             |                 |                 |        |                | 1.30a           | 2.27a    | 0.85b   | 0.05c   |               | 0.32c   | 0.25c  |      |              |

|     |                                                   |       |      |      |        |           |                    |                    |                    |                        |                    |                   |                  |      |       |
|-----|---------------------------------------------------|-------|------|------|--------|-----------|--------------------|--------------------|--------------------|------------------------|--------------------|-------------------|------------------|------|-------|
| 39  | Benzyl alcohol                                    | 21.79 | 1044 | 1051 | MS, RI | Alcohols  | 46.34 ±<br>14.84ab | 48.67 ±<br>13.83a  | 33.61 ±<br>4.60b   | 6.81 ±<br>0.27c        | 7.94 ± 1.89c       | 5.13 ±<br>1.55c   | 6.32 ±<br>1.21c  | 0.86 | 0     |
| 48  | Linalool                                          | 24.17 | 1111 | 1112 | MS, RI | Alcohols  | 141.23 ±<br>12.82b | 210.87 ±<br>53.68a | 109.38 ±<br>23.19b | 47.01 ±<br>5.73c       | 45.98 ± 7.98c      | 37.29 ±<br>12.64c | 31.93 ±<br>2.08c | 0.85 | 0     |
| 49  | 3,7-Dimethyl-1,5,7-octatriene-3-ol<br>(Hotrienol) | 24.17 | 1111 | 1106 | MS, RI | Alcohols  | 163.46 ±<br>15.09b | 245.50 ±<br>62.60a | 91.32 ±<br>77.57bc | 39.17 ±<br>32.13c<br>d | 35.81 ±<br>28.66cd | 2.54 ±<br>0.94d   | 3.85 ±<br>1.03d  | 0.84 | 0     |
| 51  | Phenylethyl alcohol                               | 24.7  | 1126 | 1127 | MS, RI | Alcohols  | 52.58 ±<br>6.42a   | 58.93 ±<br>16.62a  | 53.43 ±<br>9.01a   | 14.94 ±<br>0.62b       | 16.36 ± 4.14b      | 11.96 ±<br>3.69b  | 13.84 ±<br>2.73b | 0.89 | 0     |
| 55  | 1-Dodecanol                                       | 25.17 | 1140 | 1470 | MS, RI | Alcohols  | 1.16 ±<br>0.16b    | 1.90 ±<br>0.27a    | 0.69 ±<br>0.20c    | 0.09 ±<br>0.01d        | 0.14 ± 0.04d       | 0.06 ±<br>0.02d   | 0.05 ±<br>0.01d  | 0.88 | 0     |
| 60  | 1-Nonanol                                         | 26.36 | 1173 | 1176 | MS, RI | Alcohols  | 6.72 ±<br>0.67a    | 4.60 ±<br>0.94b    | 1.94 ±<br>0.20c    | 0.64 ±<br>0.08d        | 0.61 ± 0.12d       | 0.49 ±<br>0.25d   | 0.37 ±<br>0.06d  | 0.95 | 0     |
| 68  | α-Terpineol                                       | 27.36 | 1201 | 1202 | MS, RI | Alcohols  | 2.01 ±<br>0.25b    | 2.93 ±<br>0.45a    | 1.91 ±<br>0.34b    | 0.88 ±<br>0.05c        | 0.94 ± 0.19c       | 0.75 ±<br>0.24c   | 0.66 ±<br>0.05c  | 0.86 | 0     |
| 74  | 7-Methyl-3-methylene-6-octen-1-ol                 | 28.02 | 1223 | 1221 | MS, RI | Alcohols  | 3.24 ±<br>0.29b    | 4.59 ±<br>0.29a    | 2.69 ±<br>0.50c    | 1.26 ±<br>0.16d        | 1.42 ± 0.29d       | 1.14 ±<br>0.34d   | 0.92 ±<br>0.09d  | 0.86 | 0     |
| 102 | α-Nerolidol                                       | 37.66 | 1572 | 1566 | MS, RI | Alcohols  | 1.31 ±<br>0.15ab   | 1.67 ±<br>0.59a    | 1.71 ±<br>0.41a    | 1.03 ±<br>0.09bc       | 1.04 ± 0.26bc      | 0.68 ±<br>0.28c   | 0.69 ±<br>0.04c  | 0.96 | 0.005 |
| 2   | 2-Methylpropanal                                  | 6.23  | 567  | 558  | MS, RI | Aldehydes | 0.08 ±<br>0.02d    | 0.76 ±<br>0.31b    | 1.23 ±<br>0.25a    | 0.44 ±<br>0.05c        | 0.64 ± 0.11bc      | 0.90 ±<br>0.15b   | 0.72 ±<br>0.04bc | 1.21 | 0     |
| 4   | 3-Methylbutanal                                   | 8.18  | 630  | 634  | MS, RI | Aldehydes | 0.12 ±<br>0.04d    | 0.99 ±<br>0.37c    | 1.86 ±<br>0.27a    | 1.08 ±<br>0.11bc       | 1.79 ± 0.37a       | 1.84 ±<br>0.29a   | 1.49 ±<br>0.13ab | 1.04 | 0     |
| 5   | 2-Methylbutanal                                   | 8.45  | 638  | 645  | MS, RI | Aldehydes | 0.25 ±<br>0.08e    | 3.43 ±<br>1.58bcd  | 5.93 ±<br>0.96a    | 2.06 ±<br>0.14d        | 3.06 ± 0.58cd      | 4.81 ±<br>0.86ab  | 4.34 ±<br>0.08bc | 1.28 | 0     |

|    |                                                       |       |      |      |        |           |                     |                     |                    |                       |                      |                     |                    |      |       |
|----|-------------------------------------------------------|-------|------|------|--------|-----------|---------------------|---------------------|--------------------|-----------------------|----------------------|---------------------|--------------------|------|-------|
| 11 | Hexanal                                               | 12.86 | 779  | 782  | MS, RI | Aldehydes | 2.49 ±<br>0.49c     | 7.96 ±<br>3.89a     | 3.63 ±<br>0.29bc   | 4.08 ±<br>0.55bc      | 7.94 ± 1.92a         | 6.82 ±<br>1.86ab    | 2.30 ±<br>0.23c    | 1.28 | 0.004 |
| 12 | 2-Ethyl-2-butenal                                     | 14.06 | 817  | 808  | MS, RI | Aldehydes | 0.37 ±<br>0.08b     | 1.06 ±<br>0.24b     | 0.25 ±<br>0.11b    | 1.81 ±<br>2.71b       | 6.06 ± 1.08a         | 0.29 ±<br>0.08b     | 0.41 ±<br>0.59b    | 1.43 | 0     |
| 13 | (E)-2-Hexenal                                         | 14.9  | 844  | 850  | MS, RI | Aldehydes | 16.43 ±<br>1.71b    | 4.39 ±<br>2.06d     | 8.02 ±<br>0.94c    | 16.11 ±<br>0.11b      | 19.60 ± 3.16a        | 6.94 ±<br>1.30cd    | 3.90 ±<br>0.41d    | 1.76 | 0     |
| 21 | Heptanal                                              | 16.52 | 899  | 903  | MS, RI | Aldehydes | 0.70 ±<br>0.13cd    | 1.87 ±<br>0.69a     | 0.76 ±<br>0.11bcd  | 1.04 ±<br>0.13bc<br>d | 1.35 ± 0.30ab        | 1.17 ±<br>0.42bc    | 0.46 ±<br>0.06d    | 1.29 | 0.003 |
| 22 | Benzaldehyde                                          | 19    | 972  | 966  | MS, RI | Aldehydes | 70.81 ±<br>6.59a    | 71.39 ±<br>7.70a    | 26.65 ±<br>5.42b   | 6.83 ±<br>0.37c       | 10.36 ± 2.42c        | 6.52 ±<br>1.45c     | 6.32 ±<br>0.46c    | 0.88 | 0     |
| 31 | Octanal                                               | 20.55 | 1008 | 1009 | MS, RI | Aldehydes | 0.55 ±<br>0.09a     | 0.64 ±<br>0.14a     | 0.25 ±<br>0.03b    | 0.18 ±<br>0.04b       | 0.20 ± 0.05b         | 0.23 ±<br>0.07b     | 0.14 ±<br>0.05b    | 0.91 | 0     |
| 66 | Decanal                                               | 27.3  | 1199 | 1202 | MS, RI | Aldehydes | 13.37 ±<br>0.26a    | 8.49 ±<br>7.08ab    | 6.08 ±<br>2.08b    | 0.33 ±<br>0.01c       | 0.20 ± 0.06c         | 0.21 ±<br>0.04c     | 4.07 ±<br>0.64bc   | 1.00 | 0     |
| 71 | β-Cyclocitral                                         | 27.55 | 1207 | 1210 | MS, RI | Aldehydes | 69.21 ±<br>3.21b    | 121.19 ±<br>3.08a   | 125.74 ±<br>26.97a | 52.26 ±<br>4.25bc     | 67.02 ±<br>13.77b    | 33.52 ±<br>13.43cd  | 28.75 ±<br>3.19d   | 1.01 | 0     |
| 72 | Safranal                                              | 27.69 | 1211 | 1201 | MS, RI | Aldehydes | 0.11 ±<br>0.01c     | 0.15 ±<br>0.01b     | 0.11 ±<br>0.02c    | 0.05 ±<br>0.00e       | 0.06 ± 0.01de        | 0.08 ±<br>0.02cd    | 0.21 ±<br>0.02a    | 1.68 | 0     |
| 75 | 2-Methyl-5-isopropenyl-1-cyclopenten-1-carboxaldehyde | 28.17 | 1228 | 1271 | MS, RI | Aldehydes | 0.51 ±<br>0.03b     | 1.03 ±<br>0.20a     | 0.91 ±<br>0.17a    | 0.37 ±<br>0.03bc      | 0.36 ± 0.06bc        | 0.20 ±<br>0.05c     | 0.18 ±<br>0.04c    | 0.94 | 0     |
| 79 | β-Citral                                              | 29.3  | 1266 | 1255 | MS, RI | Aldehydes | 383.03 ±<br>97.69bc | 607.54 ±<br>162.77a | 427.69 ±<br>77.19b | ±<br>25.75c<br>d      | 291.93 ±<br>55.99bcd | 232.73 ±<br>68.83cd | 186.95 ±<br>10.31d | 0.89 | 0     |

|     |                              |       |      |      |        |           |                     |                    |                  |                  |               |                          |                    |      |       |
|-----|------------------------------|-------|------|------|--------|-----------|---------------------|--------------------|------------------|------------------|---------------|--------------------------|--------------------|------|-------|
| 81  | Citral                       | 29.73 | 1280 | 1276 | MS, RI | Aldehydes | 282.82 ±<br>243.33b | 685.14 ±<br>81.48a | 26.26 ±<br>4.71c | 17.29 ±<br>1.31c | 19.82 ± 4.29c | 106.03 ±<br>165.72b<br>c | 66.47 ±<br>97.35bc | 1.08 | 0     |
| 89  | 2-Butyl-2-octenal            | 32.69 | 1379 | 1378 | MS, RI | Aldehydes | 0.61 ±<br>0.09b     | 1.19 ±<br>0.35a    | 0.70 ±<br>0.15b  | 0.04 ±<br>0.00c  | 0.05 ± 0.01c  | 0.02 ±<br>0.01c          | 0.04 ±<br>0.02c    | 0.88 | 0     |
| 29  | 2,2,4,6,6-Pentamethylheptane | 20.05 | 1002 | 995  | MS, RI | Alkanes   | 17.91 ±<br>2.63a    | 11.98 ±<br>7.42b   | 6.40 ±<br>2.18c  | 0.30 ±<br>0.03d  | 0.42 ± 0.07d  | 0.80 ±<br>0.59d          | 0.09 ±<br>0.02d    | 0.92 | 0     |
| 30  | Decane                       | 20.26 | 1000 | 1000 | MS, RI | Alkanes   | 3.94 ±<br>0.28a     | 3.19 ±<br>1.93a    | 1.72 ±<br>0.66b  | 0.14 ±<br>0.02c  | 0.14 ± 0.04c  | 0.19 ±<br>0.13c          | 0.12 ±<br>0.04c    | 0.88 | 0     |
| 35  | 2,2,4,4-Tetramethyloctane    | 21.48 | 1035 | /    | MS, RI | Alkanes   | 4.54 ±<br>0.68a     | 2.89 ±<br>1.83b    | 1.79 ±<br>0.55b  | 0.06 ±<br>0.01c  | 0.08 ± 0.02c  | 0.19 ±<br>0.15c          | 0.15 ±<br>0.13c    | 0.94 | 0     |
| 56  | 5-Ethyldecane                | 25.46 | 1148 | 1146 | MS, RI | Alkanes   | 1.67 ±<br>0.31a     | 0.97 ±<br>0.72b    | 0.59 ±<br>0.21bc | 0.02 ±<br>0.01c  | 0.02 ± 0.01c  | 0.05 ±<br>0.03c          | 0.04 ±<br>0.00c    | 0.95 | 0     |
| 58  | 5-Methylundecane             | 26.1  | 1166 | 1156 | MS, RI | Alkanes   | 0.62 ±<br>0.18a     | 0.69 ±<br>0.45a    | 0.41 ±<br>0.12ab | 0.11 ±<br>0.00b  | 0.13 ± 0.03b  | 0.09 ±<br>0.04b          | 0.06 ±<br>0.00b    | 0.82 | 0.003 |
| 59  | 3-Methylundecane             | 26.34 | 1173 | 1173 | MS, RI | Alkanes   | 7.96 ±<br>0.70a     | 4.91 ±<br>2.98b    | 2.88 ±<br>0.87b  | 0.23 ±<br>0.01c  | 0.27 ± 0.06c  | 0.31 ±<br>0.20c          | 0.14 ±<br>0.03c    | 0.94 | 0     |
| 65  | Dodecane                     | 27.3  | 1199 | 1200 | MS, RI | Alkanes   | 13.32 ±<br>0.24a    | 8.87 ±<br>6.47ab   | 6.09 ±<br>2.11b  | 0.19 ±<br>0.02c  | 0.20 ± 0.06c  | 0.41 ±<br>0.29c          | 0.06 ±<br>0.00c    | 0.92 | 0     |
| 92  | Tetradecane                  | 33.26 | 1398 | 1400 | MS, RI | Alkanes   | 5.23 ±<br>0.51ab    | 4.33 ±<br>1.99ab   | 2.92 ±<br>0.82b  | 7.00 ±<br>0.01a  | 6.94 ± 0.05a  | 4.75 ±<br>3.77ab         | 7.02 ±<br>0.03a    | 0.80 | 0.052 |
| 101 | 3-Methylpentadecane          | 37.66 | 1572 | 1574 | MS, RI | Alkanes   | 1.67 ±<br>0.26a     | 1.61 ±<br>0.46a    | 1.08 ±<br>0.21b  | 0.17 ±<br>0.02c  | 0.13 ± 0.02c  | 0.12 ±<br>0.06c          | 0.08 ±<br>0.01c    | 0.87 | 0     |
| 104 | Hexadecane                   | 38.35 | 1599 | 1600 | MS, RI | Alkanes   | 1.16 ±<br>0.08ab    | 1.25 ±<br>0.27a    | 0.96 ±<br>0.19b  | 0.22 ±<br>0.02c  | 0.17 ± 0.01c  | 0.12 ±<br>0.04c          | 0.08 ±<br>0.01c    | 0.87 | 0     |

|    |                                          |       |      |      |        |         |                     |                     |                    |                   |                    |                     |                    |      |       |
|----|------------------------------------------|-------|------|------|--------|---------|---------------------|---------------------|--------------------|-------------------|--------------------|---------------------|--------------------|------|-------|
| 18 | 1,3,5,7-Cyclooctatetraene                | 16.23 | 887  | 880  | MS, RI | Alkenes | 0.60 ±<br>0.08a     | 0.70 ±<br>0.09a     | 0.40 ±<br>0.07b    | 0.23 ±<br>0.02c   | 0.24 ± 0.05c       | 0.16 ±<br>0.04c     | 0.19 ±<br>0.05c    | 0.85 | 0     |
| 27 | $\alpha$ -Phellandrene                   | 20.03 | 993  | 1005 | MS, RI | Alkenes | 88.11 ±<br>6.13b    | 130.62 ±<br>29.86a  | 73.10 ±<br>13.87b  | 36.42 ±<br>4.74c  | 38.41 ± 7.11c      | 30.78 ±<br>7.67c    | 28.00 ±<br>4.41c   | 0.86 | 0     |
| 28 | $\beta$ -Myrcene                         | 20.03 | 1002 | 1007 | MS, RI | Alkenes | 88.16 ±<br>6.11b    | 130.90 ±<br>29.53a  | 73.13 ±<br>13.92b  | 36.41 ±<br>4.75c  | 38.48 ± 7.17c      | 30.78 ±<br>7.67c    | 28.02 ±<br>4.41c   | 0.86 | 0     |
| 32 | $\delta$ -Carene                         | 21.11 | 1024 | 1017 | MS, RI | Alkenes | 2.62 ±<br>0.22b     | 3.29 ±<br>0.55a     | 1.85 ±<br>0.37c    | 0.76 ±<br>0.11d   | 0.83 ± 0.16d       | 0.63 ±<br>0.17d     | 0.53 ±<br>0.09d    | 0.85 | 0     |
| 36 | D-Limonene                               | 21.57 | 1037 | 1038 | MS, RI | Alkenes | 16.94 ±<br>0.76b    | 20.27 ±<br>3.84a    | 10.56 ±<br>2.13c   | 4.61 ±<br>0.62d   | 4.94 ± 0.99d       | 3.74 ±<br>1.05d     | 3.01 ±<br>0.55d    | 0.85 | 0     |
| 40 | $\beta$ -Ocimene                         | 22.13 | 1053 | 1053 | MS, RI | Alkenes | 29.72 ±<br>3.09b    | 40.40 ±<br>6.50a    | 24.50 ±<br>4.64b   | 11.58 ±<br>1.50c  | 12.72 ± 2.39c      | 9.62 ±<br>2.59c     | 9.10 ±<br>1.25c    | 0.85 | 0     |
| 42 | $\beta$ -Terpinene                       | 22.64 | 1068 | 1056 | MS, RI | Alkenes | 11.98 ±<br>18.23bc  | 40.39 ±<br>6.49a    | 24.50 ±<br>4.64b   | 11.57 ±<br>1.50bc | 12.71 ±<br>2.38bc  | 9.61 ±<br>2.59c     | 9.10 ±<br>1.25c    | 0.96 | 0.002 |
| 52 | (E, E)-2,6-dimethyl-1,3,5,7-octatetraene | 24.81 | 1129 | 1130 | MS, RI | Alkenes | 0.77 ±<br>0.04b     | 0.92 ±<br>0.10a     | 0.59 ±<br>0.11c    | 0.25 ±<br>0.03d   | 0.26 ± 0.05d       | 0.21 ±<br>0.06d     | 0.21 ±<br>0.03d    | 0.85 | 0     |
| 53 | (E, Z)-2,6-dimethylocta-2,4,6-triene     | 25.02 | 1135 | 1131 | MS, RI | Alkenes | 8.74 ±<br>0.45b     | 12.03 ±<br>2.77a    | 6.41 ±<br>1.21c    | 3.00 ±<br>0.40d   | 3.10 ± 0.53d       | 2.37 ±<br>0.58d     | 2.03 ±<br>0.38d    | 0.85 | 0     |
| 54 | 1,3,8-p-Menthatriene                     | 25.15 | 1139 | 1127 | MS, RI | Alkenes | 2.67 ±<br>0.11b     | 3.40 ±<br>0.51a     | 2.16 ±<br>0.38c    | 0.97 ±<br>0.12d   | 1.02 ± 0.19d       | 0.80 ±<br>0.20d     | 0.78 ±<br>0.13d    | 0.84 | 0     |
| 63 | 1-Dodecene                               | 27.05 | 1193 | 1192 | MS, RI | Alkenes | 0.93 ±<br>0.05b     | 0.94 ±<br>0.39b     | 2.56 ±<br>1.53a    | 0.70 ±<br>0.03b   | 0.61 ± 0.10b       | 0.51 ±<br>0.17b     | 0.67 ±<br>0.35b    | 1.14 | 0.015 |
| 69 | (E)-3-Dodecene                           | 27.46 | 1204 | 1185 | MS, RI | Alkenes | 0.22 ±<br>0.01a     | 0.20 ±<br>0.10ab    | 0.13 ±<br>0.03abc  | 0.02 ±<br>0.00d   | 0.11 ±<br>0.08bcd  | 0.02 ±<br>0.01cd    | 0.06 ±<br>0.07cd   | 0.89 | 0.003 |
| 78 | 4,5-Dimethyl-2,6-octadiene               | 29.3  | 1266 | /    | MS, RI | Alkenes | 383.24 ±<br>98.38bc | 608.81 ±<br>163.21a | 428.08 ±<br>76.63b | 257.80<br>±       | 237.34 ±<br>8.84cd | 233.26 ±<br>69.05cd | 187.08 ±<br>10.14d | 0.87 | 0     |

|     |                               |       |      |      |        |                          |                  |                  |                  | 25.96c          |               |                  |                 |      |       |
|-----|-------------------------------|-------|------|------|--------|--------------------------|------------------|------------------|------------------|-----------------|---------------|------------------|-----------------|------|-------|
|     |                               |       |      |      |        |                          |                  |                  |                  | d               |               |                  |                 |      |       |
| 88  | $\alpha$ -Cubebene            | 32.26 | 1365 | 1360 | MS, RI | Alkenes                  | 0.58 ±<br>0.25b  | 0.83 ±<br>0.12a  | 0.88 ±<br>0.17a  | 0.38 ±<br>0.02b | 0.43 ± 0.13b  | 0.36 ±<br>0.15b  | 0.32 ±<br>0.03b | 0.95 | 0.001 |
| 95  | Caryophyllene                 | 34.45 | 1446 | 1438 | MS, RI | Alkenes                  | 0.45 ±<br>0.05bc | 1.15 ±<br>0.62a  | 0.85 ±<br>0.15ab | 0.07 ±<br>0.01c | 0.66 ± 0.13b  | 0.06 ±<br>0.04c  | 0.11 ±<br>0.02c | 0.91 | 0     |
| 98  | (Z)-Calamenene                | 37.02 | 1547 | 1546 | MS, RI | Alkenes                  | 4.02 ±<br>0.57a  | 4.19 ±<br>0.76a  | 3.50 ±<br>0.62a  | 1.13 ±<br>0.06b | 1.18 ± 0.31b  | 0.99 ±<br>0.42b  | 1.26 ±<br>0.17b | 0.89 | 0     |
| 100 | $\beta$ -Calacorene           | 37.57 | 1568 | 1566 | MS, RI | Alkenes                  | 0.76 ±<br>0.16a  | 0.77 ±<br>0.19a  | 0.64 ±<br>0.11a  | 0.21 ±<br>0.01b | 0.23 ± 0.06b  | 0.20 ±<br>0.10b  | 0.38 ±<br>0.06b | 0.94 | 0     |
| 105 | Cadalene                      | 40.74 | 1670 | 1674 | MS, RI | Alkenes                  | 0.38 ±<br>0.06b  | 0.57 ±<br>0.07a  | 0.37 ±<br>0.05b  | 0.13 ±<br>0.01c | 0.13 ± 0.02c  | 0.09 ±<br>0.03c  | 0.13 ±<br>0.03c | 0.88 | 0     |
| 80  | Caprolactam                   | 29.53 | 1273 | 1266 | MS, RI | Amines                   | 0.16 ±<br>0.02b  | 0.57 ±<br>0.52a  | 0.23 ±<br>0.04ab | 0.12 ±<br>0.04b | 0.25 ± 0.05ab | 0.19 ±<br>0.03ab | 0.11 ±<br>0.12b | 0.95 | 0.169 |
| 9   | Toluene                       | 11.76 | 744  | 760  | MS, RI | Aromatic<br>hydrocarbons | 1.17 ±<br>0.22b  | 1.75 ±<br>0.08a  | 0.98 ±<br>0.22b  | 0.42 ±<br>0.09c | 0.57 ± 0.16c  | 0.62 ±<br>0.12c  | 0.60 ±<br>0.08c | 0.91 | 0     |
| 16  | 1,3-Dimethylbenzene(m-xylene) | 15.43 | 861  | 866  | MS, RI | Aromatic<br>hydrocarbons | 0.92 ±<br>0.05a  | 1.00 ±<br>0.06a  | 0.52 ±<br>0.12b  | 0.24 ±<br>0.03c | 0.25 ± 0.05c  | 0.19 ±<br>0.06c  | 0.17 ±<br>0.03c | 0.86 | 0     |
| 34  | o-Cymene                      | 21.4  | 1032 | 1039 | MS, RI | Aromatic<br>hydrocarbons | 14.66 ±<br>0.53a | 16.27 ±<br>3.83a | 7.63 ±<br>1.65b  | 3.21 ±<br>0.39c | 3.15 ± 0.55c  | 2.62 ±<br>0.63c  | 1.94 ±<br>0.39c | 0.86 | 0     |
| 47  | 1,2-Dimethyl-4-vinylbenzene   | 23.79 | 1100 | 1100 | MS, RI | Aromatic<br>hydrocarbons | 3.54 ±<br>0.41a  | 4.14 ±<br>0.93a  | 2.20 ±<br>0.46b  | 0.94 ±<br>0.10c | 0.93 ± 0.16c  | 0.71 ±<br>0.19c  | 0.57 ±<br>0.08c | 0.84 | 0     |



|    |                                          |       |      |      |        |        |                   |                   |                    |                   |                    |                   |                  |      |       |
|----|------------------------------------------|-------|------|------|--------|--------|-------------------|-------------------|--------------------|-------------------|--------------------|-------------------|------------------|------|-------|
| 41 | (Z)-3-Hexenyl crotonate                  | 22.36 | 1060 | /    | MS, RI | Esters | 0.41 ±<br>0.08b   | 0.61 ±<br>0.10a   | 0.37 ±<br>0.07b    | 0.22 ±<br>0.03c   | 0.25 ± 0.04c       | 0.16 ±<br>0.05c   | 0.14 ±<br>0.01c  | 0.89 | 0     |
| 43 | Formic acid, octyl ester                 | 22.93 | 1076 | 1109 | MS, RI | Esters | 2.78 ±<br>0.36a   | 2.53 ±<br>0.12a   | 1.20 ±<br>0.23b    | 0.53 ±<br>0.08c   | 0.58 ± 0.12c       | 0.53 ±<br>0.17c   | 0.49 ±<br>0.11c  | 0.90 | 0     |
| 62 | (E)-3-Hexenyl butanoate                  | 26.9  | 1189 | 1185 | MS, RI | Esters | 23.62 ±<br>4.13b  | 30.98 ±<br>5.30b  | 43.82 ±<br>12.78a  | 15.38 ±<br>1.28cd | 12.61 ± 3.51d      | 7.88 ±<br>3.34d   | 7.13 ±<br>1.16d  | 1.09 | 0     |
| 64 | Octanoic acid, ethyl ester               | 27.19 | 1197 | 1197 | MS, RI | Esters | 1.10 ±<br>0.22a   | 1.11 ±<br>0.32a   | 1.35 ±<br>0.25a    | 0.18 ±<br>0.02b   | 0.20 ± 0.04b       | 0.16 ±<br>0.04b   | 0.18 ±<br>0.04b  | 0.97 | 0     |
| 67 | (E)-2-Hexenyl butanoate                  | 27.3  | 1200 | 1195 | MS, RI | Esters | 8.92 ±<br>0.21a   | 1.77 ±<br>0.59c   | 4.03 ±<br>2.22b    | 1.30 ±<br>0.05c   | 1.00 ± 0.31c       | 0.64 ±<br>0.28c   | 0.65 ±<br>0.25c  | 1.22 | 0     |
| 70 | Methyl salicylate                        | 27.55 | 1207 | 1206 | MS, RI | Esters | 126.18 ±<br>5.75b | 218.76 ±<br>4.46a | 220.82 ±<br>46.80a | 93.92 ±<br>7.76bc | 119.58 ±<br>24.33b | 61.99 ±<br>24.16c | 53.49 ±<br>5.73c | 1.00 | 0     |
| 73 | Bis(2-ethylhexyl) carbonate              | 27.75 | 1214 | /    | MS, RI | Esters | 0.46 ±<br>0.07a   | 0.25 ±<br>0.14b   | 0.20 ±<br>0.06b    | 0.13 ±<br>0.03bc  | 0.13 ± 0.04bc      | 0.06 ±<br>0.07c   | 0.02 ±<br>0.00c  | 1.08 | 0     |
| 76 | (Z)-3-Hexenyl pentanoate                 | 28.36 | 1234 | 1235 | MS, RI | Esters | 4.58 ±<br>0.58b   | 7.62 ±<br>1.01b   | 23.12 ±<br>6.17a   | 7.83 ±<br>0.47b   | 6.82 ± 1.84b       | 5.76 ±<br>2.46b   | 6.90 ±<br>1.04b  | 1.30 | 0     |
| 82 | Ethyl salicylate                         | 29.88 | 1285 | 1286 | MS, RI | Esters | 0.47 ±<br>0.15c   | 1.47 ±<br>0.72b   | 3.63 ±<br>0.25a    | 0.40 ±<br>0.05c   | 0.63 ± 0.15c       | 0.15 ±<br>0.04c   | 0.13 ±<br>0.05c  | 1.18 | 0     |
| 83 | 3,7-Dimethyl-cis-2,6-octadienyl formate  | 30.56 | 1308 | 1282 | MS, RI | Esters | 1.36 ±<br>0.28b   | 5.74 ±<br>4.64a   | 3.21 ±<br>0.89ab   | 2.83 ±<br>0.05ab  | 3.70 ± 0.87ab      | 1.13 ±<br>0.52b   | 1.12 ±<br>0.16b  | 1.02 | 0.067 |
| 85 | (E)-Methyl 3,7-dimethylocta-2,6-dienoate | 31.19 | 1329 | 1321 | MS, RI | Esters | 5.98 ±<br>0.94c   | 12.29 ±<br>1.39b  | 18.51 ±<br>3.98a   | 6.52 ±<br>0.21c   | 5.83 ± 1.33c       | 3.45 ±<br>1.20c   | 4.51 ±<br>0.59c  | 1.13 | 0     |
| 86 | Dimethyl salicylate                      | 31.71 | 1346 | 1347 | MS, RI | Esters | 0.20 ±<br>0.06ab  | 0.17 ±<br>0.10b   | 0.34 ±<br>0.18a    | 0.15 ±<br>0.05b   | 0.17 ± 0.04b       | 0.09 ±<br>0.04b   | 0.10 ±<br>0.01b  | 1.16 | 0.052 |
| 90 | (Z)-3-Hexenyl hexanoate                  | 32.77 | 1382 | 1381 | MS, RI | Esters | 13.89 ±<br>4.99b  | 16.29 ±<br>4.67b  | 50.99 ±<br>13.58a  | 19.55 ±<br>1.61b  | 16.99 ± 4.45b      | 11.55 ±<br>5.84b  | 15.82 ±<br>5.15b | 1.30 | 0     |

|     |                                                                                        |       |      |      |        |                               |                  |                  |                  |                       |                   |                  |                 |      |       |
|-----|----------------------------------------------------------------------------------------|-------|------|------|--------|-------------------------------|------------------|------------------|------------------|-----------------------|-------------------|------------------|-----------------|------|-------|
| 91  | (Z)-3-Hexenyl (Z)-3-hexenoate                                                          | 32.91 | 1387 | 1388 | MS, RI | Esters                        | 3.78 ±<br>0.58b  | 4.06 ±<br>0.48b  | 4.42 ±<br>1.12b  | 1.58 ±<br>0.18b       | 1.27 ± 0.30b      | 0.76 ±<br>0.32b  | 9.15 ±<br>6.42a | 1.31 | 0.015 |
| 99  | (R)-4,4,7a-Trimethyl-5,6,7,7a-tetrahydrobenzofuran-2(4H)-one<br>(Dihydroactinidiolide) | 37.42 | 1562 | 1548 | MS, RI | Esters                        | 0.80 ±<br>0.11bc | 1.29 ±<br>0.32a  | 0.99 ±<br>0.17b  | 0.46 ±<br>0.04de      | 0.56 ± 0.14cd     | 0.25 ±<br>0.10e  | 0.26 ±<br>0.09e | 0.91 | 0     |
| 103 | (Z)-3-Hexenyl benzoate                                                                 | 38    | 1585 | 1575 | MS, RI | Esters                        | 0.11 ±<br>0.01c  | 0.29 ±<br>0.04c  | 1.30 ±<br>0.24a  | 1.14 ±<br>0.08a       | 1.26 ± 0.25a      | 0.80 ±<br>0.28b  | 0.81 ±<br>0.09b | 1.15 | 0     |
| 6   | 2-Ethylfuran                                                                           | 9.49  | 671  | 684  | MS, RI | Heterocycli<br>c<br>compounds | 6.09 ±<br>2.25a  | 4.48 ±<br>0.39a  | 2.57 ±<br>0.81b  | 1.06 ±<br>0.02b       | 1.19 ± 0.24b      | 1.37 ±<br>0.47b  | 0.97 ±<br>0.08b | 0.93 | 0     |
| 26  | (E)-2-(1-Pentenyl)furan                                                                | 20.03 | 993  | 1000 | MS, RI | Heterocycli<br>c<br>compounds | 9.65 ±<br>0.64ab | 10.35 ±<br>8.72a | 2.48 ±<br>3.40c  | 3.77 ±<br>0.50ab<br>c | 4.00 ±<br>0.75abc | 3.20 ±<br>0.82bc | 2.03 ±<br>1.68c | 0.94 | 0.06  |
| 38  | Pyrazine                                                                               | 21.72 | 1041 | 747  | MS, RI | Heterocycli<br>c<br>compounds | 2.07 ±<br>0.63c  | 4.12 ±<br>0.88a  | 3.08 ±<br>0.51b  | 1.01 ±<br>0.08d       | 1.15 ± 0.24d      | 0.83 ±<br>0.23d  | 0.86 ±<br>0.12d | 0.91 | 0     |
| 45  | Linalool oxide                                                                         | 23.17 | 1083 | 1092 | MS, RI | Heterocycli<br>c<br>compounds | 9.64 ±<br>0.49b  | 21.20 ±<br>5.19a | 11.39 ±<br>1.94b | 5.17 ±<br>0.91c       | 5.44 ± 1.20c      | 4.48 ±<br>1.31c  | 3.30 ±<br>0.22c | 0.93 | 0     |
| 61  | cis-Linalool oxide (pyranoid)                                                          | 26.67 | 1182 | 1183 | MS, RI | Heterocycli<br>c<br>compounds | 5.29 ±<br>0.26b  | 9.18 ±<br>2.23a  | 6.81 ±<br>1.50b  | 1.95 ±<br>0.24c       | 2.52 ± 0.62c      | 2.21 ±<br>0.67c  | 2.19 ±<br>0.21c | 0.90 | 0     |
| 77  | Quinoline                                                                              | 29.04 | 1257 | 1242 | MS, RI | Heterocycli<br>c<br>compounds | 0.26 ±<br>0.02b  | 0.35 ±<br>0.03a  | 0.27 ±<br>0.06b  | 0.11 ±<br>0.01c       | 0.11 ± 0.02c      | 0.08 ±<br>0.03c  | 0.07 ±<br>0.01c | 0.86 | 0     |

|     |                                     |       |      |      |        |                |         |         |         |        |               |        |        |      |       |
|-----|-------------------------------------|-------|------|------|--------|----------------|---------|---------|---------|--------|---------------|--------|--------|------|-------|
| 84  | Indole                              | 30.61 | 1310 | 1303 | MS, RI | Heterocycli    | 10.86 ± | 1.33 ±  | 0.24 ±  | 0.10 ± | 0.09 ± 0.02b  | 0.05 ± | 0.03 ± | 1.17 | 0     |
|     |                                     |       |      |      |        | c<br>compounds | 1.66a   | 0.92b   | 0.03b   | 0.02b  |               | 0.02b  | 0.00b  |      |       |
| 106 | Caffeine                            | 44.43 | 1788 | 1784 | MS, RI | Heterocycli    | 0.61 ±  | 1.43 ±  | 1.42 ±  | 1.24 ± | 1.57 ± 0.59a  | 1.19 ± | 0.70 ± | 1.16 | 0.13  |
|     |                                     |       |      |      |        | c<br>compounds | 0.08b   | 0.75ab  | 0.25ab  | 0.11ab |               | 0.65ab | 0.12ab |      |       |
| 8   | 3-Penten-2-one                      | 10.84 | 714  | 714  | MS, RI | Ketones        | 0.40 ±  | 0.38 ±  | 0.17 ±  | 0.07 ± | 0.11 ± 0.02bc | 0.11 ± | 0.07 ± | 0.89 | 0     |
|     |                                     |       |      |      |        |                | 0.06a   | 0.08a   | 0.05b   | 0.01c  |               | 0.02bc | 0.01c  |      |       |
| 17  | 2-Heptanone                         | 16.11 | 883  | 889  | MS, RI | Ketones        | 1.01 ±  | 2.09 ±  | 0.61 ±  | 0.18 ± | 0.26 ± 0.05cd | 0.36 ± | 0.36 ± | 1.02 | 0     |
|     |                                     |       |      |      |        |                | 0.13b   | 0.51a   | 0.17c   | 0.03d  |               | 0.09cd | 0.05cd |      |       |
| 20  | 5-Hexen-3-one                       | 16.43 | 893  | /    | MS, RI | Ketones        | 0.08 ±  | 0.26 ±  | 0.03 ±  | 0.02 ± | 0.03 ± 0.01b  | 0.02 ± | 0.01 ± | 0.97 | 0.032 |
|     |                                     |       |      |      |        |                | 0.04b   | 0.22a   | 0.01b   | 0.00b  |               | 0.01b  | 0.00b  |      |       |
| 25  | 6-Methyl-5-hepten-2-one             | 19.82 | 996  | 988  | MS, RI | Ketones        | 1.82 ±  | 2.80 ±  | 0.89 ±  | 0.38 ± | 0.42 ± 0.08cd | 0.25 ± | 0.24 ± | 0.90 | 0     |
|     |                                     |       |      |      |        |                | 0.28b   | 0.62a   | 0.21c   | 0.03d  |               | 0.07d  | 0.01d  |      |       |
| 44  | 3,5-Octadien-2-one                  | 22.97 | 1077 | 1090 | MS, RI | Ketones        | 13.30 ± | 21.30 ± | 14.64 ± | 6.67 ± | 11.32 ± 2.23b | 5.22 ± | 1.81 ± | 0.99 | 0     |
|     |                                     |       |      |      |        |                | 1.78b   | 0.36a   | 3.53b   | 0.11c  |               | 1.86c  | 0.18d  |      |       |
| 46  | 3-Nonanone                          | 23.5  | 1092 | 1089 | MS, RI | Ketones        | 0.17 ±  | 0.23 ±  | 0.13 ±  | 0.03 ± | 0.03 ± 0.01de | 0.06 ± | 0.02 ± | 0.85 | 0     |
|     |                                     |       |      |      |        |                | 0.02b   | 0.02a   | 0.04c   | 0.00de |               | 0.02d  | 0.00e  |      |       |
| 50  | 2,3,4-Trimethyl-2-cyclopenten-1-one | 24.17 | 1111 | 1089 | MS, RI | Ketones        | 5.31 ±  | 10.31 ± | 0.86 ±  | 0.30 ± | 0.35 ± 0.07a  | 1.80 ± | 0.27 ± | 0.79 | 0.487 |
|     |                                     |       |      |      |        |                | 7.83a   | 15.66a  | 0.19a   | 0.01a  |               | 2.79a  | 0.04a  |      |       |
| 57  | 5-Ethyl-6-methyl-3(E)-hepten-2-one  | 25.66 | 1153 | 1143 | MS, RI | Ketones        | 1.04 ±  | 2.15 ±  | 1.02 ±  | 0.25 ± | 0.33 ± 0.10c  | 0.33 ± | 0.29 ± | 0.92 | 0     |
|     |                                     |       |      |      |        |                | 0.10b   | 0.52a   | 0.24b   | 0.04c  |               | 0.12c  | 0.07c  |      |       |
| 93  | (Z)-Jasmone                         | 33.61 | 1413 | 1405 | MS, RI | Ketones        | 5.61 ±  | 3.68 ±  | 2.01 ±  | 0.93 ± | 0.98 ± 0.19d  | 0.56 ± | 0.53 ± | 0.98 | 0     |
|     |                                     |       |      |      |        |                | 0.97a   | 0.77b   | 0.18c   | 0.04d  |               | 0.20d  | 0.08d  |      |       |
| 94  | $\alpha$ -Ionone                    | 34.37 | 1443 | 1438 | MS, RI | Ketones        | 1.19 ±  | 2.07 ±  | 1.34 ±  | 0.67 ± | 0.82 ± 0.16cd | 0.36 ± | 0.31 ± | 0.91 | 0     |
|     |                                     |       |      |      |        |                | 0.23bc  | 0.41a   | 0.27b   | 0.04de |               | 0.12e  | 0.05e  |      |       |

|    |                  |       |      |      |        |                     |                  |                  |                  |                  |              |                 |                 |      |   |
|----|------------------|-------|------|------|--------|---------------------|------------------|------------------|------------------|------------------|--------------|-----------------|-----------------|------|---|
| 96 | Geranyl acetone  | 34.8  | 1460 | 1453 | MS, RI | Ketones             | 0.43 ±<br>0.04b  | 0.74 ±<br>0.02a  | 0.62 ±<br>0.11a  | 0.40 ±<br>0.01b  | 0.44 ± 0.10b | 0.15 ±<br>0.05c | 0.14 ±<br>0.11c | 1.06 | 0 |
| 97 | $\beta$ -Ionone  | 35.93 | 1504 | 1505 | MS, RI | Ketones             | 8.95 ±<br>1.31bc | 17.60 ±<br>2.78a | 11.37 ±<br>2.29b | 6.31 ±<br>0.18cd | 7.80 ± 1.64c | 4.10 ±<br>1.60d | 3.80 ±<br>0.77d | 0.94 | 0 |
| 3  | Acetic acid      | 7.22  | 599  | 600  | MS, RI | Organic<br>acids    | 0.82 ±<br>0.08a  | 0.76 ±<br>0.26a  | 0.66 ±<br>0.08a  | 0.13 ±<br>0.02b  | 0.06 ± 0.09b | 0.15 ±<br>0.04b | 0.19 ±<br>0.05b | 0.94 | 0 |
| 87 | Geranic acid     | 31.9  | 1353 | 1355 | MS, RI | Organic<br>acids    | 1.36 ±<br>0.07b  | 2.25 ±<br>0.61b  | 10.15 ±<br>3.26a | 2.69 ±<br>1.06b  | 3.57 ± 0.82b | 1.66 ±<br>0.90b | 2.05 ±<br>0.55b | 1.28 | 0 |
| 1  | Dimethyl sulfide | 5.77  | 552  | 550  | MS, RI | Sulfur<br>compounds | 1.56 ±<br>0.40c  | 13.26 ±<br>1.28a | 12.74 ±<br>3.00a | 5.37 ±<br>0.85b  | 6.60 ± 1.23b | 4.85 ±<br>1.60b | 2.22 ±<br>0.23c | 1.11 | 0 |

Data were expressed as mean  $\pm$  SD (n = 3).

RT<sup>a</sup> represents retention time; RI<sup>b</sup> represents the linear retention indices calculated from a series of *n*-alkanes (C7-C40); RI<sup>c</sup> represents retention indices referred to the literature value with HP-5ms column or equivalent chromatographic column [NIST Chemistry WebBook (<http://webbook.nist.gov/chemistry/>) and <http://www.flavornet.org/flavornet.html/>]. ID represents identification method. MS represents identification based on the NIST 11 database. VIP represents variable importance in the projection. Values in a row followed by different letters are significantly different ( $p < 0.05$ ).

**Table S4** The screened volatile components with rOAVs greater than one in sweet and floral aroma black tea during the entire manufacturing process.

| Compounds              | Threshold        | Contents (µg/L) |           |         |         |              |              |              | rOAVs           |           |         |         |              |              |              |
|------------------------|------------------|-----------------|-----------|---------|---------|--------------|--------------|--------------|-----------------|-----------|---------|---------|--------------|--------------|--------------|
|                        | values<br>(µg/L) | Fresh<br>leaves | Withering | Shaking | Rolling | Fermentation | First drying | Final firing | Fresh<br>leaves | Withering | Shaking | Rolling | Fermentation | First drying | Final firing |
| Dimethyl sulfide       | 0.3              | 1.56            | 13.26     | 12.74   | 5.37    | 6.60         | 4.85         | 2.22         | 5.20            | 44.19     | 42.47   | 17.91   | 21.99        | 16.16        | 7.40         |
| 2-Methylpropanal       | 0.49             | 0.08            | 0.76      | 1.23    | 0.44    | 0.64         | 0.90         | 0.72         | 0.16            | 1.55      | 2.51    | 0.89    | 1.30         | 1.84         | 1.46         |
| 3-Methylbutanal        | 0.2              | 0.12            | 0.99      | 1.86    | 1.08    | 1.79         | 1.84         | 1.49         | 0.58            | 4.93      | 9.30    | 5.38    | 8.95         | 9.20         | 7.43         |
| 2-Methylbutanal        | 1                | 0.25            | 3.43      | 5.93    | 2.06    | 3.06         | 4.81         | 4.34         | 0.25            | 3.43      | 5.93    | 2.06    | 3.06         | 4.81         | 4.34         |
| 2-Ethylfuran           | 2.3              | 6.09            | 4.48      | 2.57    | 1.06    | 1.19         | 1.37         | 0.97         | 2.65            | 1.95      | 1.12    | 0.46    | 0.52         | 0.60         | 0.42         |
| Hexanal                | 4.5              | 2.49            | 7.96      | 3.63    | 4.08    | 7.94         | 6.82         | 2.30         | 0.55            | 1.77      | 0.81    | 0.91    | 1.77         | 1.52         | 0.51         |
| ( <i>E</i> )-2-Hexenal | 17               | 16.43           | 4.39      | 8.02    | 16.11   | 19.60        | 6.94         | 3.90         | 0.97            | 0.26      | 0.47    | 0.95    | 1.15         | 0.41         | 0.23         |
| 1-Hexanol              | 5.6              | 6.85            | 5.11      | 3.99    | 1.91    | 1.82         | 1.31         | 0.93         | 1.22            | 0.91      | 0.71    | 0.34    | 0.32         | 0.23         | 0.17         |
| 2-Heptanone            | 1                | 1.01            | 2.09      | 0.61    | 0.18    | 0.26         | 0.36         | 0.36         | 1.01            | 2.09      | 0.61    | 0.18    | 0.26         | 0.36         | 0.36         |
| 1-Octen-3-ol           | 1                | 7.36            | 12.51     | 4.60    | 1.93    | 2.31         | 1.96         | 1.28         | 7.36            | 12.51     | 4.60    | 1.93    | 2.31         | 1.96         | 1.28         |
| $\alpha$ -Phellandrene | 36               | 88.11           | 130.62    | 73.10   | 36.42   | 38.41        | 30.78        | 28.00        | 2.45            | 3.63      | 2.03    | 1.01    | 1.07         | 0.86         | 0.78         |
| $\beta$ -Myrcene       | 15               | 88.16           | 130.90    | 73.13   | 36.41   | 38.48        | 30.78        | 28.02        | 5.88            | 8.73      | 4.88    | 2.43    | 2.57         | 2.05         | 1.87         |
| <i>o</i> -Cymene       | 11.4             | 14.66           | 16.27     | 7.63    | 3.21    | 3.15         | 2.62         | 1.94         | 1.29            | 1.43      | 0.67    | 0.28    | 0.28         | 0.23         | 0.17         |
| $\beta$ -Ocimene       | 0.02             | 29.72           | 40.40     | 24.50   | 11.58   | 12.72        | 9.62         | 9.10         | 1485.87         | 2020.19   | 1225.20 | 578.85  | 635.82       | 480.95       | 455.01       |
| 3,5-Octadien-2-one     | 0.5              | 13.30           | 21.30     | 14.64   | 6.67    | 11.32        | 5.22         | 1.81         | 26.59           | 42.60     | 29.28   | 13.35   | 22.64        | 10.44        | 3.63         |
| Linalool               | 0.22             | 141.23          | 210.87    | 109.38  | 47.01   | 45.98        | 37.29        | 31.93        | 641.97          | 958.49    | 497.16  | 213.70  | 209.02       | 169.52       | 145.13       |
| Decanal                | 5                | 13.37           | 8.49      | 6.08    | 0.33    | 0.20         | 0.21         | 4.07         | 2.67            | 1.70      | 1.22    | 0.07    | 0.04         | 0.04         | 0.81         |
| Methyl salicylate      | 40               | 126.18          | 218.76    | 220.82  | 93.92   | 119.58       | 61.99        | 53.49        | 3.15            | 5.47      | 5.52    | 2.35    | 2.99         | 1.55         | 1.34         |
| $\beta$ -Cyclocitral   | 3                | 69.21           | 121.19    | 125.74  | 52.26   | 67.02        | 33.52        | 28.75        | 23.07           | 40.40     | 41.91   | 17.42   | 22.34        | 11.17        | 9.58         |

|                 |      |        |        |        |        |        |        |        |        |         |         |        |        |        |        |
|-----------------|------|--------|--------|--------|--------|--------|--------|--------|--------|---------|---------|--------|--------|--------|--------|
| $\beta$ -Citral | 53   | 383.03 | 607.54 | 427.69 | 257.35 | 291.93 | 232.73 | 186.95 | 7.23   | 11.46   | 8.07    | 4.86   | 5.51   | 4.39   | 3.53   |
| Citral          | 30   | 282.82 | 685.14 | 26.26  | 17.29  | 19.82  | 106.03 | 66.47  | 9.43   | 22.84   | 0.88    | 0.58   | 0.66   | 3.53   | 2.22   |
| $\beta$ -Ionone | 0.01 | 8.95   | 17.60  | 11.37  | 6.31   | 7.80   | 4.10   | 3.80   | 895.11 | 1759.80 | 1136.86 | 631.48 | 780.28 | 409.87 | 379.56 |

rOAVs represents the relative odor activity values of volatile compounds.

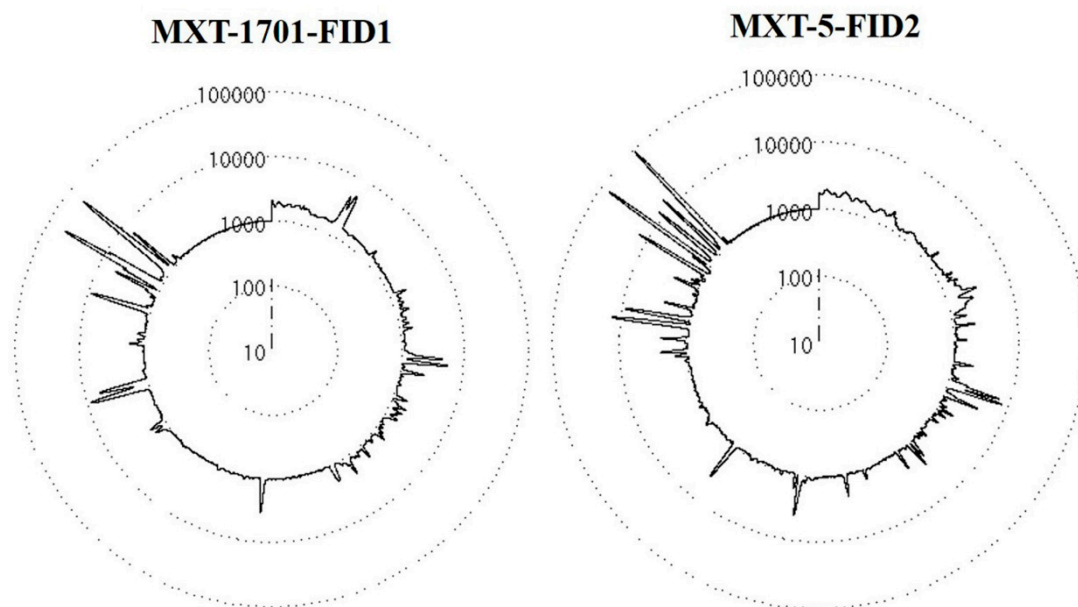

**Fig. S1** Radar map of sweet and floral aroma black tea in final firing stage by using GC-E-Nose.

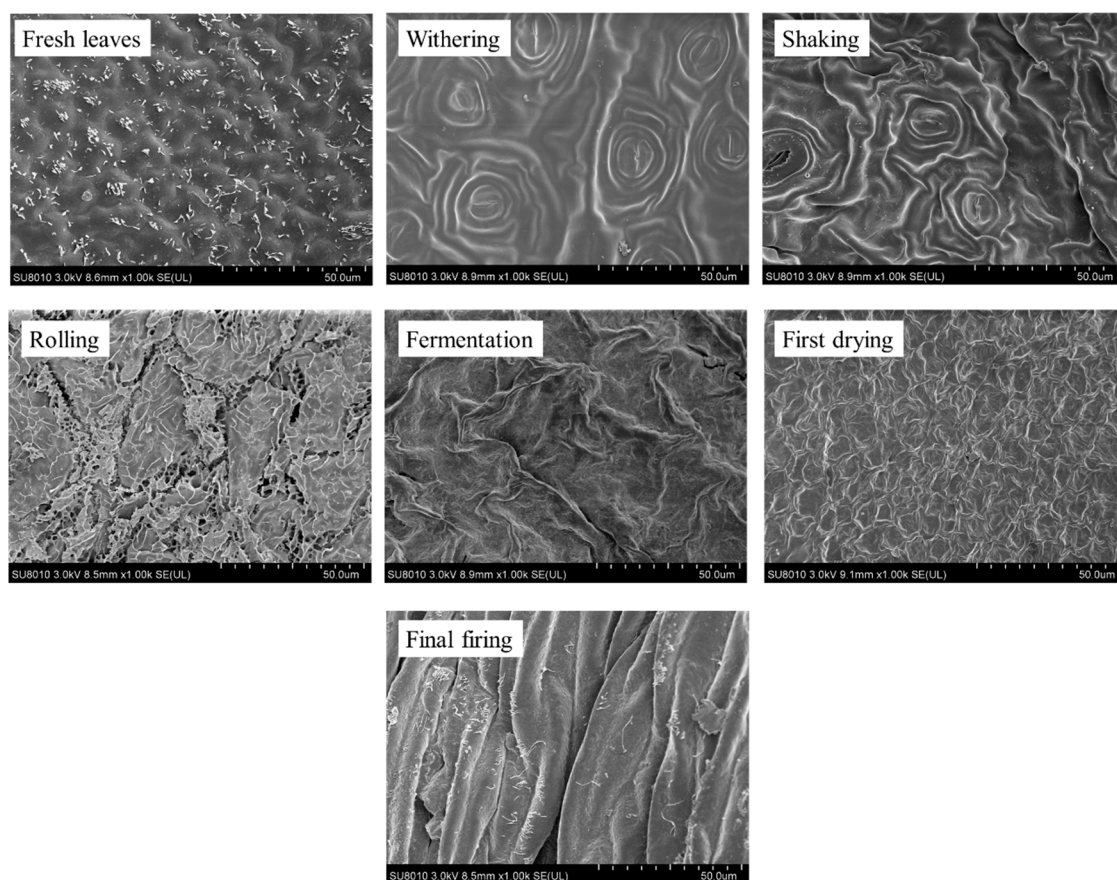

**Fig. S2** The microstructures of sweet and floral aroma black tea during the manufacturing process obtained from scanning electron microscopy.
